# Supplementary material
Source: Research Square preprint supplement (doi:10.21203/rs.3.rs-9010804/v1)

**SUPPLEMENTARY INFORMATION**

**SI1** Study area, horizontal dashes indicate patagonian ecoregions, vertical dashes indicate other ecoregions also considered for the study.

**
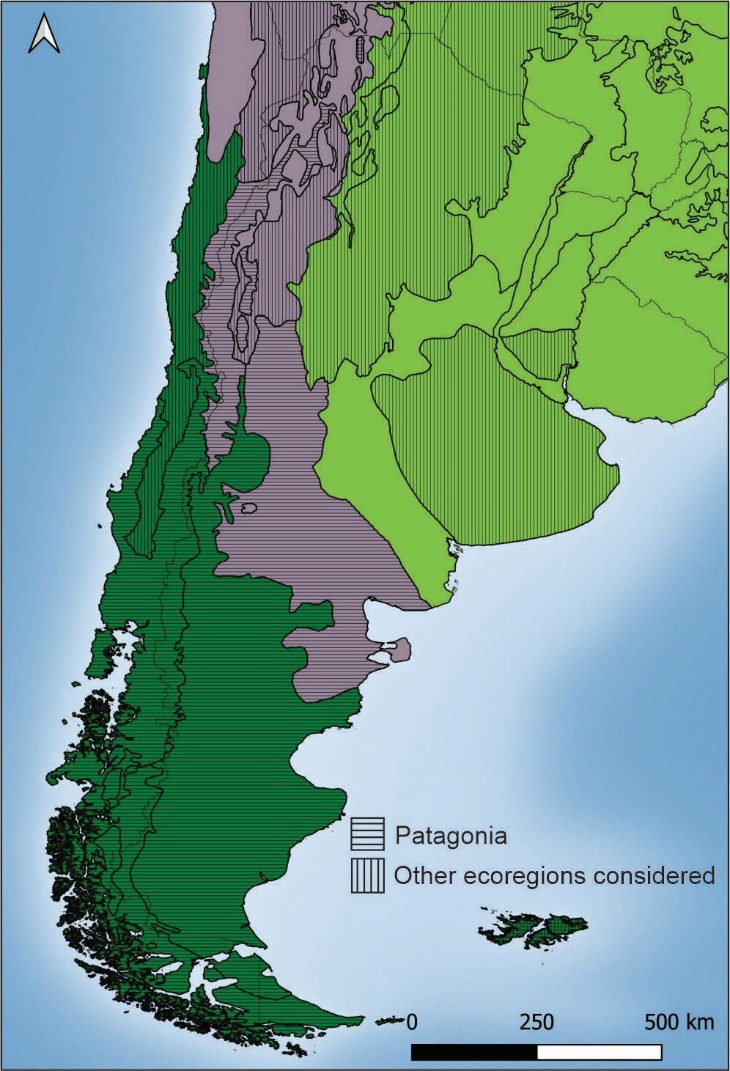
**

**SI2.** Species of *Bembidion* distributed in the Patagonian ecoregions with georeferenced records.

| **Species** | **Latitude** | **Longitude** | **Source** | **Author of the species** |
| --- | --- | --- | --- | --- |
| *B. antarcticum* | -41.96834 | -71.53555 | IADIZA | Fairmaire, 1889 |
| *B. antarcticum* | -46.28809 | -69.34189 | IADIZA:CEI:10495 | Fairmaire, 1889 |
| *B. antarcticum* | -49.96498 | -73.13034 | IADIZA:CEI:10496 | Fairmaire, 1889 |
| *B. antarcticum* | -51.68333 | -69.7 | IADIZA:CEI:10497 | Fairmaire, 1889 |
| *B. antarcticum* | -54.16344 | -67.06244 | IADIZA:CEI:10498 | Fairmaire, 1889 |
| *B. antarcticum* | -54.1634 | -67.0624 | FIML | Fairmaire, 1889 |
| *B. antarcticum* | -43.42937 | -71.55619 | IADIZA:CEI:21746 | Fairmaire, 1889 |
| *B. antarcticum* | -45.24312 | -69.12338 | IADIZA | Fairmaire, 1889 |
| *B. antarcticum* | -42.2 | -70.83333 | IADIZA | Fairmaire, 1889 |
| *B. antarcticum* | -42.25 | -71.68333 | IADIZA:CEI:10502 | Fairmaire, 1889 |
| *B. antarcticum* | -43.72139 | -67.2807 | IADIZA:CEI:10499 | Fairmaire, 1889 |
| *B. antarcticum* | -43.76728 | -70.14129 | IADIZA:CEI:10501 | Fairmaire, 1889 |
| *B. antarcticum* | -43.46227 | -70.8564 | IADIZA:CEI:10504 | Fairmaire, 1889 |
| *B. antarcticum* | -39.0333 | -70.4 | IADIZA:CEI:10507 | Fairmaire, 1889 |
| *B. antarcticum* | -52.07452 | -69.78417 | IADIZA:CEI:5832 | Fairmaire, 1889 |
| *B. antarcticum* | -53.15 | -70.9166 | IADIZA:CEI:5825 | Fairmaire, 1889 |
| *B. antarcticum* | -52.02587 | -70.73445 | IADIZA:CEI:5826 | Fairmaire, 1889 |
| *B. antarcticum* | -38.4333 | -71.8833 | IADIZA | Fairmaire, 1889 |
| *B. aricensis* | -22.4666 | -68.9333 | Ferrú & Elgueta, 2011 | Jeannel, 1962 |
| *B. aricensis* | -23.65 | -70.4 | Jeannel, 1962 | Jeannel, 1962 |
| *B. aricensis* | -21.66244 | -69.54022 | Ferrú & Elgueta, 2011 | Jeannel, 1962 |
| *B. aricensis* | -18.3833 | -70.2833 | Jeannel, 1962 | Jeannel, 1962 |
| *B. aricensis* | -18.48333 | -70.33333 | Jeannel, 1962 | Jeannel, 1962 |
| *B. aricensis* | -18.4746 | -70.29792 | Ferrú & Elgueta, 2011 | Jeannel, 1962 |
| *B. aricensis* | -18.47993 | -70.29955 | Ferrú & Elgueta, 2011 | Jeannel, 1962 |
| *B. aricensis* | -18.4 | -70.31667 | IADIZA | Jeannel, 1962 |
| *B. aricensis* | -18.4 | -70.3166 | Jeannel, 1962; Ferrú & Elgueta, 2011 | Jeannel, 1962 |
| *B. aricensis* | -18.41667 | -70.1 | Jeannel, 1962; Ferrú & Elgueta, 2011 | Jeannel, 1962 |
| *B. aricensis* | -20.331 | -69.71171 | Ferrú & Elgueta, 2011 | Jeannel, 1962 |
| *B. aricensis* | -20.21667 | -70.16667 | Ferrú & Elgueta, 2011 | Jeannel, 1962 |
| *B. aricensis* | -20.48872 | -69.32817 | Ferrú & Elgueta, 2011 | Jeannel, 1962 |
| *B. aubei* | -34.632 | -58.436 | IADIZA | Solier, 1849 |
| *B. aubei* | -34.4721 | -58.51339 | IADIZA:CEI:5803 | Solier, 1849 |
| *B. aubei* | -40.93597 | -70.23131 | IADIZA:CEI:21744 | Solier, 1849 |
| *B. aubei* | -41.15 | -71.3 | IADIZA:CEI:5799 | Solier, 1849 |
| *B. aubei* | -41.96834 | -71.53555 | IADIZA:CEI:5804 | Solier, 1849 |
| *B. aubei* | -41.85069 | -70.9027 | Nègre, 1973 | Solier, 1849 |
| *B. aubei* | -41.15049 | -71.29317 | IADIZA | Solier, 1849 |
| *B. aubei* | -46.28809 | -69.34189 | IADIZA:CEI:10548 | Solier, 1849 |
| *B. aubei* | -50.1988 | -70.93063 | IADIZA:CEI:21063 | Solier, 1849 |
| *B. aubei* | -49.96498 | -73.13034 | FIML | Solier, 1849 |
| *B. aubei* | -50.34049 | -72.47662 | IADIZA | Solier, 1849 |
| *B. aubei* | -47.7516 | -65.89685 | MNHN | Solier, 1849 |
| *B. aubei* | -49.36184 | -69.68728 | IADIZA:CEI:22744 | Solier, 1849 |
| *B. aubei* | -54.21667 | -67.2 | IADIZA:CEI:5793 | Solier, 1849 |
| *B. aubei* | -51.9166 | -59 | MNHN | Solier, 1849 |
| *B. aubei* | -54.29549 | -66.70689 | IADIZA | Solier, 1849 |
| *B. aubei* | -42.06667 | -71.5 | Nègre, 1973 | Solier, 1849 |
| *B. aubei* | -45.83076 | -69.05186 | IADIZA:CEI:21742 | Solier, 1849 |
| *B. aubei* | -43.76728 | -70.14129 | IADIZA:CEI:10550 | Solier, 1849 |
| *B. aubei* | -43.46227 | -70.8564 | IADIZA:CEI:21739 | Solier, 1849 |
| *B. aubei* | -40.03333 | -71.58333 | IADIZA:CEI:5791 | Solier, 1849 |
| *B. aubei* | -28.0883 | -71.1522 | Jeannel, 1962 | Solier, 1849 |
| *B. aubei* | -31.91167 | -71.51306 | IADIZA | Solier, 1849 |
| *B. aubei* | -29.33333 | -71.25 | IADIZA:CEI:5838 | Solier, 1849 |
| *B. aubei* | -42.5 | -73.9166 | Jeannel, 1962 | Solier, 1849 |
| *B. aubei* | -52.62002 | -70.21947 | CJEB | Solier, 1849 |
| *B. aubei* | -33.3666 | -71.6666 | IADIZA | Solier, 1849 |
| *B. aubei* | -33.43 | -71.67 | IADIZA:CEI:5805 | Solier, 1849 |
| *B. aubei* | -36.8333 | -73.05 | IADIZA | Solier, 1849 |
| *B. aubei* | -35.3333 | -72.4166 | IADIZA | Solier, 1849 |
| *B. aubei* | -33.43333 | -70.66667 | Reed, 1874 | Solier, 1849 |
| *B. calverti* | -41.50667 | -71.50667 | IADIZA:CEI:5834 | Germain, 1906 |
| *B. calverti* | -39.57028 | -71.44083 | IADIZA:CEI:5833 | Germain, 1906 |
| *B. calverti* | -40.00113 | -70.83369 | IADIZA:CEI:5835 | Germain, 1906 |
| *B. calverti* | -38.94823 | -71.33302 | IADIZA | Germain, 1906 |
| *B. calverti* | -38.8166 | -71.2833 | IADIZA | Germain, 1906 |
| *B. calverti* | -38.05 | -71.71667 | Jeannel, 1962 | Germain, 1906 |
| *B. calverti* | -35.3333 | -72.4166 | Germain, 1906 | Germain, 1906 |
| *B. calverti* | -34.99906 | -70.81776 | IADIZA | Germain, 1906 |
| *B. chaudoirianus* | -34.49827 | -58.51835 | IADIZA:CEI:4975 | Csiki, 1929 |
| *B. chaudoirianus* | -35.6 | -59.81667 | Cicchino & Storti, 2007 | Csiki, 1929 |
| *B. chaudoirianus* | -32.06353 | -64.5404 | IADIZA | Csiki, 1929 |
| *B. chaudoirianus* | -30.6385 | -64.89933 | IADIZA:CEI:4962 | Csiki, 1929 |
| *B. chaudoirianus* | -29.8165 | -64.72133 | IADIZA:CEI:5251 | Csiki, 1929 |
| *B. chaudoirianus* | -29.88592 | -64.66736 | IADIZA:CEI:21778 | Csiki, 1929 |
| *B. chaudoirianus* | -35.19861 | -68.71944 | IADIZA:CEI:4969 | Csiki, 1929 |
| *B. chaudoirianus* | -32.81208 | -69.1341 | IADIZA | Csiki, 1929 |
| *B. chaudoirianus* | -32.89972 | -68.84399 | IADIZA | Csiki, 1929 |
| *B. chaudoirianus* | -33.39941 | -67.16322 | IADIZA:CEI:21787 | Csiki, 1929 |
| *B. chaudoirianus* | -32.59042 | -69.35138 | IADIZA | Csiki, 1929 |
| *B. chaudoirianus* | -32.3795 | -69.39283 | IADIZA | Csiki, 1929 |
| *B. chaudoirianus* | -35.58333 | -69.15 | ÌADIZA | Csiki, 1929 |
| *B. chaudoirianus* | -33.38767 | -69.48067 | IADIZA | Csiki, 1929 |
| *B. chaudoirianus* | -33.25 | -69.28333 | IADIZA | Csiki, 1929 |
| *B. chaudoirianus* | -32.93667 | -69.21517 | IADIZA | Csiki, 1929 |
| *B. chaudoirianus* | -34.045 | -67.90944 | IADIZA:CEI:21644 | Csiki, 1929 |
| *B. chaudoirianus* | -34.9048 | -68.88726 | IADIZA:CEI:5322 | Csiki, 1929 |
| *B. chaudoirianus* | -32.38611 | -68.04306 | IADIZA:CEI:5698 | Csiki, 1929 |
| *B. chaudoirianus* | -32.88333 | -68.81667 | IADIZA | Csiki, 1929 |
| *B. chaudoirianus* | -37.88067 | -67.835 | IADIZA:CEI:4948 | Csiki, 1929 |
| *B. chaudoirianus* | -37.8805 | -67.836 | IADIZA:CEI:4808 | Csiki, 1929 |
| *B. chaudoirianus* | -39.11667 | -66.75 | IADIZA:CEI:4961 | Csiki, 1929 |
| *B. chaudoirianus* | -33.13333 | -66.51667 | IADIZA | Csiki, 1929 |
| *B. chaudoirianus* | -26.3666 | -64.6833 | FIML | Csiki, 1929 |
| *B. chaudoirianus* | -25.45 | -57.53333 | IADIZA | Csiki, 1929 |
| *B. chilensis* | -27.62712 | -66.1412 | IADIZA:CEI:5640 | Solier, 1849 |
| *B. chilensis* | -35.31961 | -70.33383 | IADIZA:CEI:10247 | Solier, 1849 |
| *B. chilensis* | -32.83278 | -69.33093 | IADIZA:CEI:4550 | Solier, 1849 |
| *B. chilensis* | -32.96084 | -69.212 | IADIZA:CEI:4615 | Solier, 1849 |
| *B. chilensis* | -32.29667 | -69.46929 | IADIZA:CEI:4591 | Solier, 1849 |
| *B. chilensis* | -32.28859 | -69.5058 | IADIZA:CEI:4605 | Solier, 1849 |
| *B. chilensis* | -32.71667 | -69.56667 | IADIZA:CEI:4527 | Solier, 1849 |
| *B. chilensis* | -32.95059 | -69.30799 | IADIZA:CEI:5136 | Solier, 1849 |
| *B. chilensis* | -32.62032 | -69.47101 | IADIZA:CEI:4606 | Solier, 1849 |
| *B. chilensis* | -32.91923 | -69.24265 | IADIZA:CEI:4517 | Solier, 1849 |
| *B. chilensis* | -32.58974 | -69.35094 | IADIZA:CEI:4611 | Solier, 1849 |
| *B. chilensis* | -33.07533 | -69.143 | IADIZA:CEI:5559 | Solier, 1849 |
| *B. chilensis* | -37.16667 | -69.24938 | IADIZA:CEI:4335 | Solier, 1849 |
| *B. chilensis* | -32.64469 | -69.19728 | IADIZA:CEI:4293 | Solier, 1849 |
| *B. chilensis* | -32.52342 | -68.99508 | IADIZA:CEI:6075 | Solier, 1849 |
| *B. chilensis* | -32.81317 | -69.31278 | IADIZA:CEI:4472 | Solier, 1849 |
| *B. chilensis* | -32.34197 | -69.43119 | IADIZA:CEI:21581 | Solier, 1849 |
| *B. chilensis* | -32.31326 | -69.46613 | IADIZA:CEI:15219 | Solier, 1849 |
| *B. chilensis* | -32.622 | -69.4704 | IADIZA | Solier, 1849 |
| *B. chilensis* | -32.37099 | -69.44336 | IADIZA:CEI:21571 | Solier, 1849 |
| *B. chilensis* | -32.5605 | -69.3425 | IADIZA:CEI:4585 | Solier, 1849 |
| *B. chilensis* | -35.5323 | -70.00731 | IADIZA:CEI:23134 | Solier, 1849 |
| *B. chilensis* | -34.88254 | -68.56731 | IADIZA:CEI:5567 | Solier, 1849 |
| *B. chilensis* | -32.51503 | -69.05122 | IADIZA:CEI:21612 | Solier, 1849 |
| *B. chilensis* | -32.67 | -69.3652 | IADIZA:CEI:21954 | Solier, 1849 |
| *B. chilensis* | -32.59042 | -69.35138 | IADIZA:CEI:4537 | Solier, 1849 |
| *B. chilensis* | -32.49311 | -69.36694 | IADIZA:CEI:4332 | Solier, 1849 |
| *B. chilensis* | -32.84569 | -68.89654 | IADIZA:CEI:4337 | Solier, 1849 |
| *B. chilensis* | -33.61353 | -69.47847 | IADIZA:CEI:21619 | Solier, 1849 |
| *B. chilensis* | -33.60111 | -69.43289 | IADIZA:CEI:21622 | Solier, 1849 |
| *B. chilensis* | -32.52388 | -68.99929 | IADIZA:CEI:6067 | Solier, 1849 |
| *B. chilensis* | -33.011 | -69.12217 | IADIZA:CEI:5566 | Solier, 1849 |
| *B. chilensis* | -32.90748 | -69.2335 | IADIZA:CEI:4536 | Solier, 1849 |
| *B. chilensis* | -33.34767 | -69.431 | IADIZA:CEI:4523 | Solier, 1849 |
| *B. chilensis* | -35.8666 | -69.4333 | IADIZA | Solier, 1849 |
| *B. chilensis* | -36.07283 | -68.75058 | IADIZA:CEI:4283 | Solier, 1849 |
| *B. chilensis* | -32.65 | -69.3666 | IADIZA:CEI:4289 | Solier, 1849 |
| *B. chilensis* | -32.537 | -69.43517 | IADIZA:CEI:4618 | Solier, 1849 |
| *B. chilensis* | -32.50222 | -69.05553 | IADIZA:CEI:6072 | Solier, 1849 |
| *B. chilensis* | -32.66667 | -69.51667 | IADIZA:CEI:4296 | Solier, 1849 |
| *B. chilensis* | -32.52719 | -69.0375 | IADIZA:CEI:5478 | Solier, 1849 |
| *B. chilensis* | -32.50835 | -69.05456 | IADIZA:CEI:5497 | Solier, 1849 |
| *B. chilensis* | -35.94954 | -69.41197 | IADIZA:CEI:23139 | Solier, 1849 |
| *B. chilensis* | -32.66667 | -69.5 | IADIZA | Solier, 1849 |
| *B. chilensis* | -32.3795 | -69.39283 | IADIZA:CEI:4288 | Solier, 1849 |
| *B. chilensis* | -32.83333 | -69.06667 | IADIZA:CEI:5563 | Solier, 1849 |
| *B. chilensis* | -41.15 | -71.3 | IADIZA:CEI:4291 | Solier, 1849 |
| *B. chilensis* | -41.85069 | -70.9027 | IADIZA:CEI:4333 | Solier, 1849 |
| *B. chilensis* | -32.58533 | -64.95017 | IADIZA:CEI:4462 | Solier, 1849 |
| *B. chilensis* | -32.66083 | -66.12617 | IADIZA:CEI:4469 | Solier, 1849 |
| *B. chilensis* | -32.65 | -64.95861 | IADIZA:CEI:5554 | Solier, 1849 |
| *B. chilensis* | -32.61222 | -66.07444 | IADIZA:CEI:5138 | Solier, 1849 |
| *B. chilensis* | -33.105 | -66.06111 | IADIZA:CEI:5548 | Solier, 1849 |
| *B. chilensis* | -33.01917 | -66.28333 | IADIZA:CEI:5549 | Solier, 1849 |
| *B. chilensis* | -44.5617 | -66.0028 | IADIZA:CEI:11259 | Solier, 1849 |
| *B. chilensis* | -42.76067 | -71.10822 | IADIZA:CEI:11266 | Solier, 1849 |
| *B. chilensis* | -44.04832 | -68.60651 | IADIZA:CEI:11272 | Solier, 1849 |
| *B. chilensis* | -45.24312 | -69.12338 | IADIZA:CEI:11258 | Solier, 1849 |
| *B. chilensis* | -45.82572 | -69.06174 | IADIZA:CEI:11264 | Solier, 1849 |
| *B. chilensis* | -45.83076 | -69.05186 | IADIZA:CEI:11261 | Solier, 1849 |
| *B. chilensis* | -42.73355 | -71.09466 | IADIZA:CEI:11260 | Solier, 1849 |
| *B. chilensis* | -37.26528 | -70.5225 | IADIZA:CEI:4623 | Solier, 1849 |
| *B. chilensis* | -39.57028 | -71.44083 | IADIZA:CEI:4314 | Solier, 1849 |
| *B. chilensis* | -40.48333 | -71.35 | IADIZA:CEI:4290 | Solier, 1849 |
| *B. chilensis* | -40.0801 | -71.3232 | IADIZA | Solier, 1849 |
| *B. chilensis* | -38.21681 | -70.25262 | IADIZA:CEI:4246 | Solier, 1849 |
| *B. chilensis* | -40.8705 | -71.054 | IADIZA | Solier, 1849 |
| *B. chilensis* | -40.91667 | -71.08333 | IADIZA:CEI:4232 | Solier, 1849 |
| *B. chilensis* | -17.46523 | -68.96323 | Toledano, 2008 | Solier, 1849 |
| *B. chilensis* | -25.01666 | -70.45 | IADIZA | Solier, 1849 |
| *B. chilensis* | -23.36667 | -67.85 | IADIZA:CEI:4282 | Solier, 1849 |
| *B. chilensis* | -23.3666 | -67.85 | IADIZA | Solier, 1849 |
| *B. chilensis* | -31.5 | -70.7166 | IADIZA | Solier, 1849 |
| *B. chilensis* | -30.11 | -70.703 | IADIZA | Solier, 1849 |
| *B. chilensis* | -30.095 | -70.721 | IADIZA | Solier, 1849 |
| *B. chilensis* | -29.9533 | -71.3436 | Jeannel, 1962 | Solier, 1849 |
| *B. chilensis* | -30.15337 | -70.65947 | IADIZA | Solier, 1849 |
| *B. chilensis* | -30.20416 | -70.04192 | IADIZA | Solier, 1849 |
| *B. chilensis* | -31.6308 | -71.1652 | Jeannel, 1962 | Solier, 1849 |
| *B. chilensis* | -19.46022 | -69.95778 | IADIZA:CEI:21628 | Solier, 1849 |
| *B. chilensis* | -33.2 | -71.11667 | IADIZA | Solier, 1849 |
| *B. chilensis* | -33.43 | -71.67 | IADIZA:CEI:4538 | Solier, 1849 |
| *B. chilensis* | -32.88333 | -71.26667 | IADIZA | Solier, 1849 |
| *B. chilensis* | -36.9015 | -71.545 | IADIZA | Solier, 1849 |
| *B. chilensis* | -35.30754 | -70.8684 | IADIZA | Solier, 1849 |
| *B. chilensis* | -35.51669 | -70.4491 | IADIZA:CEI:10244 | Solier, 1849 |
| *B. chilensis* | -34.99906 | -70.81776 | IADIZA | Solier, 1849 |
| *B. chilensis* | -33.88333 | -70.88333 | Jeannel, 1962 | Solier, 1849 |
| *B. chilensis* | -33.82097 | -71.08637 | IADIZA | Solier, 1849 |
| *B. chilensis* | -33.61667 | -70.43333 | IADIZA | Solier, 1849 |
| *B. chilensis* | -33.28333 | -70.66667 | Solier, 1849 | Solier, 1849 |
| *B. convergens* | -34.83806 | -58.51722 | Nègre, 1973 | Berg, 1883 |
| *B. convergens* | -35.01667 | -59.3 | Berg, 1883 | Berg, 1883 |
| *B. convergens* | -38.00228 | -57.55754 | MACN | Berg, 1883 |
| *B. convergens* | -34.49827 | -58.51835 | IADIZA:CEI:5028 | Berg, 1883 |
| *B. convergens* | -38.21667 | -57.86667 | IADIZA:CEI:5016 | Berg, 1883 |
| *B. convergens* | -38.98323 | -61.30082 | IADIZA:CEI:5017 | Berg, 1883 |
| *B. convergens* | -39.69852 | -62.10957 | IADIZA | Berg, 1883 |
| *B. convergens* | -34.4721 | -58.51339 | IADIZA:CEI:5018 | Berg, 1883 |
| *B. convergens* | -38.0574 | -62.02048 | IADIZA | Berg, 1883 |
| *B. convergens* | -34.42583 | -58.59667 | IADIZA | Berg, 1883 |
| *B. convergens* | -26.8705 | -66.7344 | IADIZA:CEI:21797 | Berg, 1883 |
| *B. convergens* | -26.51667 | -67.41328 | IADIZA:CEI:5042 | Berg, 1883 |
| *B. convergens* | -27.22896 | -66.83131 | MACN | Berg, 1883 |
| *B. convergens* | -27.49264 | -66.96782 | IADIZA | Berg, 1883 |
| *B. convergens* | -26.62956 | -66.92362 | MACN | Berg, 1883 |
| *B. convergens* | -26.68333 | -66.03333 | MACN | Berg, 1883 |
| *B. convergens* | -30.4 | -64.03333 | IADIZA:CEI:4989 | Berg, 1883 |
| *B. convergens* | -32.06353 | -64.5404 | IADIZA | Berg, 1883 |
| *B. convergens* | -30.635 | -64.89933 | IADIZA:CEI:5048 | Berg, 1883 |
| *B. convergens* | -29.8165 | -64.72133 | IADIZA:CEI:4994 | Berg, 1883 |
| *B. convergens* | -29.88592 | -64.66736 | IADIZA:CEI:21795 | Berg, 1883 |
| *B. convergens* | -22.72049 | -65.69697 | FIML | Berg, 1883 |
| *B. convergens* | -31.429 | -67.06717 | IADIZA:CEI:5014 | Berg, 1883 |
| *B. convergens* | -35.54933 | -68.0635 | IADIZA:CEI:4993 | Berg, 1883 |
| *B. convergens* | -33.07533 | -69.143 | IADIZA:CEI:5012 | Berg, 1883 |
| *B. convergens* | -32.88333 | -68.81667 | Jeannel, 1962 | Berg, 1883 |
| *B. convergens* | -34.97181 | -67.72111 | IADIZA:CEI:4992 | Berg, 1883 |
| *B. convergens* | -34.04033 | -67.90567 | IADIZA:CEI:4996 | Berg, 1883 |
| *B. convergens* | -34.00333 | -67.91889 | IADIZA:CEI:5054 | Berg, 1883 |
| *B. convergens* | -33.84692 | -67.89528 | IADIZA:CEI:21798 | Berg, 1883 |
| *B. convergens* | -36.22679 | -69.37661 | IADIZA:CEI:21654 | Berg, 1883 |
| *B. convergens* | -35.19833 | -68.71944 | IADIZA:CEI:5055 | Berg, 1883 |
| *B. convergens* | -34.9048 | -68.88726 | IADIZA:CEI:21802 | Berg, 1883 |
| *B. convergens* | -36.28106 | -68.52611 | IADIZA:CEI:5037 | Berg, 1883 |
| *B. convergens* | -40.89423 | -65.14282 | IADIZA | Berg, 1883 |
| *B. convergens* | -40.93597 | -70.23131 | IADIZA:CEI:21796 | Berg, 1883 |
| *B. convergens* | -40.8769 | -65.12166 | IADIZA:CEI:10510 | Berg, 1883 |
| *B. convergens* | -41.06665 | -65.17184 | IADIZA:CEI:22853 | Berg, 1883 |
| *B. convergens* | -39.38227 | -65.69579 | FIML | Berg, 1883 |
| *B. convergens* | -37.88067 | -67.835 | IADIZA:CEI:4990 | Berg, 1883 |
| *B. convergens* | -41.96834 | -71.53555 | MNHN | Berg, 1883 |
| *B. convergens* | -39.03333 | -67.58333 | IADIZA:CEI:5015 | Berg, 1883 |
| *B. convergens* | -39.11667 | -66.75 | IADIZA:CEI:4976 | Berg, 1883 |
| *B. convergens* | -41.03333 | -70.61667 | IADIZA:CEI:4987 | Berg, 1883 |
| *B. convergens* | -39.00369 | -64.08716 | IADIZA | Berg, 1883 |
| *B. convergens* | -33.11944 | -65.91194 | IADIZA:CEI:4995 | Berg, 1883 |
| *B. convergens* | -46.28809 | -69.34189 | IADIZA:CEI:10538 | Berg, 1883 |
| *B. convergens* | -28.6833 | -62.9 | Jeannel, 1962 | Berg, 1883 |
| *B. convergens* | -44.5617 | -66.0028 | IADIZA:CEI:10544 | Berg, 1883 |
| *B. convergens* | -45.24312 | -69.12338 | IADIZA:CEI:10543 | Berg, 1883 |
| *B. convergens* | -45.95 | -67.55 | FIML | Berg, 1883 |
| *B. convergens* | -43.72139 | -67.2807 | IADIZA:CEI:10535 | Berg, 1883 |
| *B. convergens* | -42.77814 | -65.02025 | IADIZA:CEI:10532 | Berg, 1883 |
| *B. convergens* | -38.05982 | -69.06303 | IADIZA:CEI:4983 | Berg, 1883 |
| *B. convergens* | -39.45 | -70.18333 | IADIZA:CEI:4980 | Berg, 1883 |
| *B. convergens* | -40.03333 | -71.58333 | IADIZA:CEI:5035 | Berg, 1883 |
| *B. convergens* | -40.7245 | -71.0937 | IADIZA:CEI:4984 | Berg, 1883 |
| *B. convergens* | -40.11667 | -71.66667 | FIML | Berg, 1883 |
| *B. convergens* | -40.00113 | -70.83369 | IADIZA:CEI:5002 | Berg, 1883 |
| *B. convergens* | -38.18333 | -68.96667 | IADIZA:CEI:4981 | Berg, 1883 |
| *B. convergens* | -38.95 | -69.4666 | IADIZA:CEI:4985 | Berg, 1883 |
| *B. convergens* | -37.29861 | -69.69114 | IADIZA:CEI:5057 | Berg, 1883 |
| *B. convergens* | -40.15 | -71.56667 | IADIZA:CEI:5036 | Berg, 1883 |
| *B. convergens* | -40.23231 | -70.81552 | IADIZA | Berg, 1883 |
| *B. convergens* | -36.87222 | -69.76 | FIML | Berg, 1883 |
| *B. convergens* | -39.83333 | -70.88333 | IADIZA:CEI:4986 | Berg, 1883 |
| *B. convergens* | -39 | -68.41667 | IADIZA:CEI:4988 | Berg, 1883 |
| *B. convergens* | -39.98333 | -71.08333 | IADIZA:CEI:5013 | Berg, 1883 |
| *B. convergens* | -39.02834 | -70.02189 | IADIZA:CEI:4982 | Berg, 1883 |
| *B. convergens* | -34.89343 | -56.15546 | IADIZA | Berg, 1883 |
| *B. cupreostriatus* | -32.31991 | -69.37654 | IADIZA:CEI:3931 | Germain, 1906 |
| *B. cupreostriatus* | -35.47083 | -68.072 | IADIZA:CEI:5701 | Germain, 1906 |
| *B. cupreostriatus* | -36.72148 | -69.85705 | IADIZA:CEI:3867 | Germain, 1906 |
| *B. cupreostriatus* | -32.83278 | -69.33093 | IADIZA:CEI:4868 | Germain, 1906 |
| *B. cupreostriatus* | -32.28859 | -69.5058 | IADIZA:CEI:3904 | Germain, 1906 |
| *B. cupreostriatus* | -33.07533 | -69.143 | IADIZA:CEI:5147 | Germain, 1906 |
| *B. cupreostriatus* | -32.35026 | -69.49084 | IADIZA:CEI:21575 | Germain, 1906 |
| *B. cupreostriatus* | -32.59042 | -69.35138 | IADIZA:CEI:4877 | Germain, 1906 |
| *B. cupreostriatus* | -32.97571 | -69.17925 | IADIZA:CEI:21662 | Germain, 1906 |
| *B. cupreostriatus* | -32.49311 | -69.36694 | IADIZA:CEI:5700 | Germain, 1906 |
| *B. cupreostriatus* | -32.37783 | -69.42033 | IADIZA:CEI:4876 | Germain, 1906 |
| *B. cupreostriatus* | -32.915 | -69.2375 | IADIZA:CEI:4869 | Germain, 1906 |
| *B. cupreostriatus* | -32.81667 | -69.95 | IADIZA:CEI:3942 | Germain, 1906 |
| *B. cupreostriatus* | -33.7336 | -69.1176 | IADIZA:CEI:21724 | Germain, 1906 |
| *B. cupreostriatus* | -33.011 | -69.12217 | IADIZA:CEI:3933 | Germain, 1906 |
| *B. cupreostriatus* | -35.28582 | -68.24319 | IADIZA:CEI:3864 | Germain, 1906 |
| *B. cupreostriatus* | -33.34767 | -69.431 | IADIZA:CEI:4872 | Germain, 1906 |
| *B. cupreostriatus* | -33.25 | -69.28333 | IADIZA:CEI:4870 | Germain, 1906 |
| *B. cupreostriatus* | -32.93667 | -69.21517 | IADIZA:CEI:4874 | Germain, 1906 |
| *B. cupreostriatus* | -32.29167 | -69.51933 | IADIZA:CEI:4875 | Germain, 1906 |
| *B. cupreostriatus* | -32.90748 | -69.2335 | IADIZA:CEI:4867 | Germain, 1906 |
| *B. cupreostriatus* | -32.88333 | -68.81667 | IADIZA:CEI:4873 | Germain, 1906 |
| *B. cupreostriatus* | -41.15 | -71.3 | IADIZA:CEI:4885 | Germain, 1906 |
| *B. cupreostriatus* | -37.88067 | -67.835 | IADIZA:CEI:5149 | Germain, 1906 |
| *B. cupreostriatus* | -37.8805 | -67.836 | IADIZA:CEI:4788 | Germain, 1906 |
| *B. cupreostriatus* | -39.04957 | -67.58848 | IADIZA:CEI:4878 | Germain, 1906 |
| *B. cupreostriatus* | -39.11667 | -66.75 | IADIZA:CEI:4884 | Germain, 1906 |
| *B. cupreostriatus* | -25.18855 | -65.80244 | IADIZA:CEI:5215 | Germain, 1906 |
| *B. cupreostriatus* | -31.79597 | -69.33367 | IADIZA:CEI:21172 | Germain, 1906 |
| *B. cupreostriatus* | -29.20062 | -69.3588 | IADIZA:CEI:21732 | Germain, 1906 |
| *B. cupreostriatus* | -46.28809 | -69.34189 | IADIZA:CEI:10374 | Germain, 1906 |
| *B. cupreostriatus* | -51.61967 | -69.22194 | IADIZA:CEI:4890 | Germain, 1906 |
| *B. cupreostriatus* | -44.5617 | -66.0028 | IADIZA:CEI:10375 | Germain, 1906 |
| *B. cupreostriatus* | -42.25 | -71.68333 | IADIZA:CEI:3893 | Germain, 1906 |
| *B. cupreostriatus* | -43.72139 | -67.2807 | IADIZA:CEI:10376 | Germain, 1906 |
| *B. cupreostriatus* | -39.45 | -70.18333 | IADIZA:CEI:4895 | Germain, 1906 |
| *B. cupreostriatus* | -40.03333 | -71.58333 | IADIZA:CEI:4888 | Germain, 1906 |
| *B. cupreostriatus* | -39.75 | -70.61667 | IADIZA:CEI:3891 | Germain, 1906 |
| *B. cupreostriatus* | -37.37809 | -70.27068 | IADIZA:CEI:3916 | Germain, 1906 |
| *B. cupreostriatus* | -40.9333 | -71.55 | IADIZA:CEI:4891 | Germain, 1906 |
| *B. cupreostriatus* | -36.83333 | -71.11667 | IADIZA:CEI:3906 | Germain, 1906 |
| *B. cupreostriatus* | -39.98333 | -70.01667 | IADIZA:CEI:4887 | Germain, 1906 |
| *B. cupreostriatus* | -38.21681 | -70.25262 | IADIZA:CEI:3901 | Germain, 1906 |
| *B. cupreostriatus* | -40.18333 | -71.63333 | IADIZA:CEI:4894 | Germain, 1906 |
| *B. cupreostriatus* | -40.15 | -71.56667 | IADIZA:CEI:3930 | Germain, 1906 |
| *B. cupreostriatus* | -40.00113 | -70.83369 | IADIZA:CEI:4886 | Germain, 1906 |
| *B. cupreostriatus* | -40.15504 | -71.3533 | IADIZA:CEI:3898 | Germain, 1906 |
| *B. cupreostriatus* | -33.0477 | -71.6011 | Jeannel, 1962 | Germain, 1906 |
| *B. cupreostriatus* | -33.00806 | -71.51972 | Jeannel, 1962 | Germain, 1906 |
| *B. cupreostriatus* | -36.85 | -71.4 | Germain, 1906 | Germain, 1906 |
| *B. cupreostriatus* | -33.55809 | -70.31257 | IADIZA:CEI:4896 | Germain, 1906 |
| *B. derbesi* | -26.9 | -66.0667 | MACN | Solier, 1849 |
| *B. derbesi* | -26.86243 | -66.30198 | IADIZA | Solier, 1849 |
| *B. derbesi* | -27.49264 | -66.96782 | MACN | Solier, 1849 |
| *B. derbesi* | -32.34197 | -69.43119 | IADIZA:CEI:21586 | Solier, 1849 |
| *B. derbesi* | -32.31326 | -69.46613 | IADIZA:CEI:21591 | Solier, 1849 |
| *B. derbesi* | -32.52342 | -68.99508 | IADIZA:CEI:21609 | Solier, 1849 |
| *B. derbesi* | -32.3708 | -69.44025 | IADIZA:CEI:4058 | Solier, 1849 |
| *B. derbesi* | -32.68105 | -69.52548 | IADIZA:CEI:5261 | Solier, 1849 |
| *B. derbesi* | -31.79597 | -69.33367 | IADIZA:CEI:21163 | Solier, 1849 |
| *B. derbesi* | -18.40211 | -69.64907 | IADIZA | Solier, 1849 |
| *B. derbesi* | -31.6308 | -71.1652 | Solier, 1849 | Solier, 1849 |
| *B. derbesi* | -33.3666 | -71.6666 | Jeannel, 1962 | Solier, 1849 |
| *B. derbesi* | -32.4333 | -71.2333 | Jeannel, 1962 | Solier, 1849 |
| *B. derbesi* | -32.25 | -70.4666 | IADIZA | Solier, 1849 |
| *B. derbesi* | -33.28333 | -70.66667 | MNHN | Solier, 1849 |
| *B. engelhardti* | -27.49264 | -66.96782 | MACN | Jensen-Haarup, 1910 |
| *B. engelhardti* | -27.48029 | -67.1724 | MACN | Jensen-Haarup, 1910 |
| *B. engelhardti* | -26.74962 | -66.0581 | MACN | Jensen-Haarup, 1910 |
| *B. engelhardti* | -30.05 | -66.88333 | CJEB | Jensen-Haarup, 1910 |
| *B. engelhardti* | -30.05 | -66.8833 | MACN | Jensen-Haarup, 1910 |
| *B. engelhardti* | -32.8753 | -68.8448 | Jeannel, 1962 | Jensen-Haarup, 1910 |
| *B. engelhardti* | -34.9048 | -68.88726 | IADIZA:CEI:5296 | Jensen-Haarup, 1910 |
| *B. engelhardti* | -34.41667 | -68.9 | IADIZA | Jensen-Haarup, 1910 |
| *B. engelhardti* | -24.78636 | -65.40789 | IADIZA:CEI:10479 | Jensen-Haarup, 1910 |
| *B. engelhardti* | -33.03967 | -66.51322 | IADIZA | Jensen-Haarup, 1910 |
| *B. engelhardti* | -28.6833 | -62.9 | Jeannel, 1962 | Jensen-Haarup, 1910 |
| *B. engelhardti* | -26.81667 | -65.21667 | Jeannel, 1962 | Jensen-Haarup, 1910 |
| *B. engelhardti* | -42.61819 | -64.2698 | IADIZA:CEI:21174 | Jensen-Haarup, 1910 |
| *B. engelhardti* | -37.37809 | -70.27068 | IADIZA | Jensen-Haarup, 1910 |
| *B. engelhardti* | -38.21681 | -70.25262 | IADIZA:CEI:4127 | Jensen-Haarup, 1910 |
| *B. engelhardti* | -39.20331 | -70.1043 | IADIZA | Jensen-Haarup, 1910 |
| *B. engelhardti* | -38.2143 | -70.0931 | IADIZA | Jensen-Haarup, 1910 |
| *B. engelhardti* | -17.68333 | -63.18333 | Toledano, 2008 | Jensen-Haarup, 1910 |
| *B. engelhardti* | -17.55462 | -63.66932 | Toledano, 2008 | Jensen-Haarup, 1910 |
| *B. engelhardti* | -17.46133 | -63.6605 | Toledano, 2008 | Jensen-Haarup, 1910 |
| *B. engelhardti* | -17.71667 | -63.38333 | Toledano, 2008 | Jensen-Haarup, 1910 |
| *B. engelhardti* | -18.50254 | -63.46643 | Toledano, 2008 | Jensen-Haarup, 1910 |
| *B. engelhardti* | -17.79844 | -63.18333 | Toledano, 2008 | Jensen-Haarup, 1910 |
| *B. engelhardti* | -17.74109 | -63.32626 | Toledano, 2008 | Jensen-Haarup, 1910 |
| *B. epistomale* | -32.81667 | -70.08333 | IADIZA:CEI:4166 | Jeannel, 1962 |
| *B. epistomale* | -32.81667 | -69.95 | IADIZA:CEI:3755 | Jeannel, 1962 |
| *B. epistomale* | -32.97503 | -69.37031 | IADIZA:CEI:3787 | Jeannel, 1962 |
| *B. epistomale* | -32.51378 | -69.01183 | IADIZA:CEI:22308 | Jeannel, 1962 |
| *B. epistomale* | -50.21204 | -70.79156 | IADIZA:CEI:21079 | Jeannel, 1962 |
| *B. epistomale* | -37.26528 | -70.5225 | IADIZA:CEI:3789 | Jeannel, 1962 |
| *B. epistomale* | -30.50976 | -70.21961 | IADIZA:CEI:3790 | Jeannel, 1962 |
| *B. epistomale* | -52.819 | -70.849 | Jeannel, 1962 | Jeannel, 1962 |
| *B. epistomale* | -35.51669 | -70.4491 | IADIZA:CEI:10248 | Jeannel, 1962 |
| *B. fischeri* | -37.61778 | -57.42111 | Castro, 2014 | Solier, 1849 |
| *B. fisheri* | -34.1122 | -58.811 | Cicchino et al., 2013 | Solier, 1849 |
| *B. fisheri* | -34.88333 | -57.9 | Paleologos, 2012 | Solier, 1849 |
| *B. fisheri* | -37.93333 | -57.73333 | Cicchino, 2006a | Solier, 1849 |
| *B. fisheri* | -37.63123 | -57.43198 | Cicchino, 2006b | Solier, 1849 |
| *B. fisheri* | -35.6 | -59.81667 | Cicchino y Storti, 2007 | Solier, 1849 |
| *B. fisheri* | -35.42945 | -57.15195 | Cicchino, 2009 | Solier, 1849 |
| *B. fisheri* | -38.08544 | -57.56049 | Cicchino, 2007 | Solier, 1849 |
| *B. fisheri* | -37.88067 | -67.835 | IADIZA:CEI:5111 | Solier, 1849 |
| *B. fisheri* | -33.3666 | -71.6666 | Jeannel, 1962 | Solier, 1849 |
| *B. fisheri* | -34.89343 | -56.15546 | Tremoleras, 1931 | Solier, 1849 |
| *B. germaini* | -29.41853 | -66.82561 | IADIZA:CEI:11307 | Jeannel, 1962 |
| *B. germaini* | -34.24381 | -68.67303 | IADIZA:CEI:21142 | Jeannel, 1962 |
| *B. hirtipes* | -27.61983 | -67.01683 | Roig-Juñent & Scheibler, 2004 | Jeannel, 1962 |
| *B. hirtipes* | -27.62712 | -66.1412 | IADIZA:CEI:5622 | Jeannel, 1962 |
| *B. hirtipes* | -28.34361 | -65.40111 | IADIZA:CEI:4782 | Jeannel, 1962 |
| *B. hirtipes* | -30.69317 | -64.66183 | Roig-Juñent & Scheibler, 2004 | Jeannel, 1962 |
| *B. hirtipes* | -32.68694 | -64.71389 | IADIZA:CEI:6058 | Jeannel, 1962 |
| *B. hirtipes* | -32.06353 | -64.5404 | IADIZA | Jeannel, 1962 |
| *B. hirtipes* | -31.77633 | -65.00678 | IADIZA:CEI:5092 | Jeannel, 1962 |
| *B. hirtipes* | -31.79297 | -65.00972 | IADIZA:CEI:5102 | Jeannel, 1962 |
| *B. hirtipes* | -22.2 | -65.58333 | MACN | Jeannel, 1962 |
| *B. hirtipes* | -30.55889 | -66.35306 | Roig-Juñent & Scheibler, 2004 | Jeannel, 1962 |
| *B. hirtipes* | -30.76944 | -66.41417 | Roig-Juñent & Scheibler, 2004 | Jeannel, 1962 |
| *B. hirtipes* | -35.54933 | -68.0635 | Roig-Juñent & Scheibler, 2004 | Jeannel, 1962 |
| *B. hirtipes* | -32.85 | -68.93333 | Roig-Juñent & Scheibler, 2004 | Jeannel, 1962 |
| *B. hirtipes* | -33.39941 | -67.16322 | Roig-Juñent & Scheibler, 2004 | Jeannel, 1962 |
| *B. hirtipes* | -32.87917 | -68.92817 | Roig-Juñent & Scheibler, 2004 | Jeannel, 1962 |
| *B. hirtipes* | -35.8666 | -69.4333 | Roig-Juñent & Scheibler, 2004 | Jeannel, 1962 |
| *B. hirtipes* | -35.16892 | -68.69397 | Roig-Juñent & Scheibler, 2004 | Jeannel, 1962 |
| *B. hirtipes* | -36.28106 | -68.52611 | Roig-Juñent & Scheibler, 2004 | Jeannel, 1962 |
| *B. hirtipes* | -26.05 | -65.88333 | IADIZA:CEI:5078 | Jeannel, 1962 |
| *B. hirtipes* | -32.9324 | -65.60764 | Roig-Juñent & Scheibler, 2004 | Jeannel, 1962 |
| *B. hirtipes* | -33.03778 | -65.66417 | Roig-Juñent & Scheibler, 2004 | Jeannel, 1962 |
| *B. hirtipes* | -32.9167 | -66.13333 | IADIZA:CEI:5274 | Jeannel, 1962 |
| *B. hirtipes* | -32.65028 | -64.95639 | Roig-Juñent & Scheibler, 2004 | Jeannel, 1962 |
| *B. hirtipes* | -33.01917 | -66.28333 | Roig-Juñent & Scheibler, 2004 | Jeannel, 1962 |
| *B. hirtipes* | -32.66083 | -66.12617 | Roig-Juñent & Scheibler, 2004 | Jeannel, 1962 |
| *B. hirtipes* | -33.11944 | -65.91194 | Roig-Juñent & Scheibler, 2004 | Jeannel, 1962 |
| *B. hirtipes* | -33.13333 | -66.51667 | IADIZA | Jeannel, 1962 |
| *B. hirtipes* | -33.105 | -66.06111 | Roig-Juñent & Scheibler, 2004 | Jeannel, 1962 |
| *B. hirtipes* | -33.10917 | -66.10889 | IADIZA | Jeannel, 1962 |
| *B. hornensis* | -53.68333 | -67.85 | IADIZA:CEI:3887 | Jeannel, 1962 |
| *B. hornensis* | -53.35245 | -68.22644 | IADIZA:CEI:3882 | Jeannel, 1962 |
| *B. hornensis* | -54.20446 | -67.52322 | IADIZA:CEI:3051 | Jeannel, 1962 |
| *B. hornensis* | -53.86667 | -67.78333 | IADIZA:CEI:21735 | Jeannel, 1962 |
| *B. hornensis* | -54.2045 | -67.5232 | IADIZA | Jeannel, 1962 |
| *B. hornensis* | -55.95 | -67.2833 | Jeannel, 1962 | Jeannel, 1962 |
| *B. hornensis* | -52.02587 | -70.73445 | IADIZA | Jeannel, 1962 |
| *B. jacobseni* | -34.62997 | -58.46329 | MLP | Jensen-Haarup, 1910 |
| *B. jacobseni* | -37.76941 | -58.3085 | IADIZA:CEI:21781 | Jensen-Haarup, 1910 |
| *B. jacobseni* | -34.17928 | -58.25245 | MLP | Jensen-Haarup, 1910 |
| *B. jacobseni* | -34.96667 | -57.88333 | IADIZA:CEI:21761 | Jensen-Haarup, 1910 |
| *B. jacobseni* | -34.91667 | -57.83368 | Paleologos, 2012 | Jensen-Haarup, 1910 |
| *B. jacobseni* | -35.6 | -59.81667 | Cicchino y Storti, 2007 | Jensen-Haarup, 1910 |
| *B. jacobseni* | -35.42945 | -57.15195 | Cicchino, 2009 | Jensen-Haarup, 1910 |
| *B. jacobseni* | -38.08544 | -57.56049 | Cicchino, 2007 | Jensen-Haarup, 1910 |
| *B. jacobseni* | -34.4721 | -58.51339 | IADIZA | Jensen-Haarup, 1910 |
| *B. jacobseni* | -28.34361 | -65.40111 | IADIZA:CEI:4783 | Jensen-Haarup, 1910 |
| *B. jacobseni* | -29.6064 | -64.8483 | IADIZA:CEI:21756 | Jensen-Haarup, 1910 |
| *B. jacobseni* | -30.635 | -64.89933 | IADIZA:CEI:21719 | Jensen-Haarup, 1910 |
| *B. jacobseni* | -24.48278 | -61.45028 | IADIZA:CEI:21695 | Jensen-Haarup, 1910 |
| *B. jacobseni* | -31.429 | -67.06717 | IADIZA:CEI:21710 | Jensen-Haarup, 1910 |
| *B. jacobseni* | -33 | -68.86667 | IADIZA:CEI:21709 | Jensen-Haarup, 1910 |
| *B. jacobseni* | -32.81235 | -68.77356 | IADIZA:CEI:5768 | Jensen-Haarup, 1910 |
| *B. jacobseni* | -32.22549 | -67.80662 | IADIZA:CEI:21782 | Jensen-Haarup, 1910 |
| *B. jacobseni* | -33.7336 | -69.1176 | IADIZA:CEI:21754 | Jensen-Haarup, 1910 |
| *B. jacobseni* | -32.93667 | -69.21517 | IADIZA:CEI:21752 | Jensen-Haarup, 1910 |
| *B. jacobseni* | -32.95363 | -69.19927 | IADIZA:CEI:21114 | Jensen-Haarup, 1910 |
| *B. jacobseni* | -32.90748 | -69.2335 | IADIZA:CEI:21722 | Jensen-Haarup, 1910 |
| *B. jacobseni* | -32.50336 | -68.17623 | IADIZA:CEI:21096 | Jensen-Haarup, 1910 |
| *B. jacobseni* | -33.29481 | -69.01367 | IADIZA:CEI:21747 | Jensen-Haarup, 1910 |
| *B. jacobseni* | -23.9 | -64.05 | FIML | Jensen-Haarup, 1910 |
| *B. jacobseni* | -31.65179 | -68.28105 | IADIZA:CEI:21718 | Jensen-Haarup, 1910 |
| *B. jacobseni* | -32.58533 | -64.95017 | IADIZA:CEI:21716 | Jensen-Haarup, 1910 |
| *B. jacobseni* | -33.03778 | -65.66417 | IADIZA:CEI:21776 | Jensen-Haarup, 1910 |
| *B. jacobseni* | -32.66083 | -66.12617 | IADIZA:CEI:21723 | Jensen-Haarup, 1910 |
| *B. jacobseni* | -28.84056 | -64.00556 | IADIZA:CEI:21780 | Jensen-Haarup, 1910 |
| *B. jacobseni* | -26.2833 | -64.4833 | FIML | Jensen-Haarup, 1910 |
| *B. jacobseni* | -27.2166 | -61.2 | MLP | Jensen-Haarup, 1910 |
| *B. jacobseni* | -27.46056 | -58.98389 | IADIZA:CEI:5822 | Jensen-Haarup, 1910 |
| *B. jacobseni* | -13.33333 | -65.33333 | Toledano, 2008 | Jensen-Haarup, 1910 |
| *B. laticolle* | -34.58503 | -58.4201 | IADIZA:CEI:10494 | Brullé, 1843 |
| *B. laticolle* | -37.91667 | -58.33333 | IADIZA:CEI:21687 | Brullé, 1843 |
| *B. laticolle* | -37.88333 | -58.26667 | IADIZA:CEI:5790 | Brullé, 1843 |
| *B. laticolle* | -34.88333 | -57.9 | Paleologos, 2012 | Brullé, 1843 |
| *B. laticolle* | -37.92824 | -57.81883 | Cicchino & Farina, 2007a | Brullé, 1843 |
| *B. laticolle* | -34.83806 | -58.51722 | Nègre, 1973 | Brullé, 1843 |
| *B. laticolle* | -34.91139 | -57.92837 | Marassas et al., 2010 | Brullé, 1843 |
| *B. laticolle* | -34.17928 | -58.25245 | Cicchino & Scampani, 2000 | Brullé, 1843 |
| *B. laticolle* | -37.93333 | -57.73333 | Cicchino, 2006a | Brullé, 1843 |
| *B. laticolle* | -37.63123 | -57.43198 | Cicchino, 2006b | Brullé, 1843 |
| *B. laticolle* | -35.6 | -59.81667 | Cicchino & Storti, 2007 | Brullé, 1843 |
| *B. laticolle* | -35.42945 | -57.15195 | Cicchino, 2009 | Brullé, 1843 |
| *B. laticolle* | -38.08544 | -57.56049 | Cicchino, 2007 | Brullé, 1843 |
| *B. laticolle* | -34.4721 | -58.51339 | IADIZA:CEI:5789 | Brullé, 1843 |
| *B. laticolle* | -34.42583 | -58.59667 | IADIZA | Brullé, 1843 |
| *B. laticolle* | -34.53333 | -58.55 | IADIZA:CEI:5823 | Brullé, 1843 |
| *B. laticolle* | -32.06353 | -64.5404 | IADIZA | Brullé, 1843 |
| *B. laticolle* | -23.67528 | -64.90253 | IADIZA:CEI:21703 | Brullé, 1843 |
| *B. laticolle* | -33.39941 | -67.16322 | IADIZA:CEI:21707 | Brullé, 1843 |
| *B. laticolle* | -32.97571 | -69.17925 | IADIZA:CEI:21701 | Brullé, 1843 |
| *B. laticolle* | -32.22549 | -67.80662 | IADIZA:CEI:21699 | Brullé, 1843 |
| *B. laticolle* | -33.7336 | -69.1176 | IADIZA:CEI:21704 | Brullé, 1843 |
| *B. laticolle* | -34.04033 | -67.90567 | IADIZA:CEI:21688 | Brullé, 1843 |
| *B. laticolle* | -32.50336 | -68.17623 | IADIZA:CEI:21100 | Brullé, 1843 |
| *B. laticolle* | -36.28106 | -68.52611 | IADIZA:CEI:5788 | Brullé, 1843 |
| *B. laticolle* | -41.15 | -71.3 | IADIZA:CEI:5178 | Brullé, 1843 |
| *B. laticolle* | -37.88067 | -67.835 | IADIZA:CEI:5110 | Brullé, 1843 |
| *B. laticolle* | -41.96834 | -71.53555 | MNHN | Brullé, 1843 |
| *B. laticolle* | -41.50667 | -71.50667 | IADIZA:CEI:21788 | Brullé, 1843 |
| *B. laticolle* | -41.3525 | -71.62625 | IADIZA | Brullé, 1843 |
| *B. laticolle* | -41.11667 | -71.15 | IADIZA:CEI:5206 | Brullé, 1843 |
| *B. laticolle* | -26.05 | -65.88333 | IADIZA:CEI:21700 | Brullé, 1843 |
| *B. laticolle* | -25.22806 | -65.43458 | IADIZA:CEI:21678 | Brullé, 1843 |
| *B. laticolle* | -31.36456 | -69.79836 | Jeannel, 1962 | Brullé, 1843 |
| *B. laticolle* | -33.2375 | -66.23878 | IADIZA:CEI:21708 | Brullé, 1843 |
| *B. laticolle* | -32.73292 | -65.29109 | IADIZA:CEI:21706 | Brullé, 1843 |
| *B. laticolle* | -33.105 | -66.06111 | IADIZA:CEI:21789 | Brullé, 1843 |
| *B. laticolle* | -28.6833 | -62.9 | Jeannel, 1962 | Brullé, 1843 |
| *B. laticolle* | -28.73333 | -61.88333 | IADIZA:CEI:5829 | Brullé, 1843 |
| *B. laticolle* | -42.06667 | -71.5 | MNHN | Brullé, 1843 |
| *B. laticolle* | -42.25 | -71.68333 | IADIZA:CEI:21790 | Brullé, 1843 |
| *B. laticolle* | -42.23333 | -71.35 | IADIZA:CEI:5207 | Brullé, 1843 |
| *B. laticolle* | -39.57028 | -71.44083 | IADIZA:CEI:5241 | Brullé, 1843 |
| *B. laticolle* | -40.03333 | -71.58333 | IADIZA:CEI:5197 | Brullé, 1843 |
| *B. laticolle* | -40.16056 | -71.72 | IADIZA:CEI:21685 | Brullé, 1843 |
| *B. laticolle* | -40.00113 | -70.83369 | IADIZA:CEI:5226 | Brullé, 1843 |
| *B. laticolle* | -40.15504 | -71.3533 | IADIZA:CEI:21686 | Brullé, 1843 |
| *B. laticolle* | -39.98333 | -71.08333 | IADIZA:CEI:21791 | Brullé, 1843 |
| *B. laticolle* | -22.2666 | -68.6333 | IADIZA | Brullé, 1843 |
| *B. laticolle* | -29.9533 | -71.3436 | IADIZA | Brullé, 1843 |
| *B. laticolle* | -33.3666 | -71.6666 | IADIZA | Brullé, 1843 |
| *B. laticolle* | -32.78333 | -71.21667 | IADIZA | Brullé, 1843 |
| *B. laticolle* | -32.97309 | -71.12672 | IADIZA | Brullé, 1843 |
| *B. laticolle* | -33.16915 | -71.14838 | IADIZA | Brullé, 1843 |
| *B. laticolle* | -32.89339 | -71.29481 | IADIZA | Brullé, 1843 |
| *B. laticolle* | -33.63333 | -78.86667 | IADIZA | Brullé, 1843 |
| *B. laticolle* | -32.88333 | -71.26667 | IADIZA | Brullé, 1843 |
| *B. laticolle* | -33.5333 | -71.6 | IADIZA | Brullé, 1843 |
| *B. laticolle* | -33.0477 | -71.6011 | MNHN | Brullé, 1843 |
| *B. laticolle* | -33.00806 | -71.51972 | IADIZA | Brullé, 1843 |
| *B. laticolle* | -35.3333 | -72.4166 | IADIZA | Brullé, 1843 |
| *B. laticolle* | -34.99906 | -70.81776 | IADIZA | Brullé, 1843 |
| *B. laticolle* | -33.85326 | -70.93346 | IADIZA | Brullé, 1843 |
| *B. laticolle* | -33.74269 | -70.45289 | Solervicens Alessandri, 2014 | Brullé, 1843 |
| *B. laticolle* | -33.72458 | -70.49115 | MUNCE | Brullé, 1843 |
| *B. laticolle* | -33.6666 | -70.9333 | IADIZA | Brullé, 1843 |
| *B. laticolle* | -37.61778 | -57.42111 | Castro, 2014 | Brullé, 1843 |
| *B. lonae* | -34.17928 | -58.25245 | IADIZA | Jensen-Haarup, 1910 |
| *B. lonae* | -28.24817 | -67.45817 | IADIZA:CEI:4931 | Jensen-Haarup, 1910 |
| *B. lonae* | -27.49264 | -66.96782 | MACN | Jensen-Haarup, 1910 |
| *B. lonae* | -27.01333 | -66.25167 | IADIZA:CEI:4930 | Jensen-Haarup, 1910 |
| *B. lonae* | -32.21667 | -65.05 | FUNCo | Jensen-Haarup, 1910 |
| *B. lonae* | -35.54933 | -68.0635 | IADIZA:CEI:4929 | Jensen-Haarup, 1910 |
| *B. lonae* | -32.88333 | -68.81667 | Jeannel, 1962 | Jensen-Haarup, 1910 |
| *B. lonae* | -33.39941 | -67.16322 | IADIZA:CEI:5295 | Jensen-Haarup, 1910 |
| *B. lonae* | -32.79431 | -68.58784 | IADIZA:CEI:22732 | Jensen-Haarup, 1910 |
| *B. lonae* | -32.82009 | -68.61109 | IADIZA:CEI:22731 | Jensen-Haarup, 1910 |
| *B. lonae* | -34.04033 | -67.90567 | IADIZA:CEI:4944 | Jensen-Haarup, 1910 |
| *B. lonae* | -37.20508 | -69.11328 | IADIZA:CEI:4928 | Jensen-Haarup, 1910 |
| *B. lonae* | -35.95208 | -69.98665 | IADIZA:CEI:23125 | Jensen-Haarup, 1910 |
| *B. lonae* | -34.9048 | -68.88726 | IADIZA:CEI:5281 | Jensen-Haarup, 1910 |
| *B. lonae* | -36.28106 | -68.52611 | IADIZA:CEI:4919 | Jensen-Haarup, 1910 |
| *B. lonae* | -34.78269 | -68.02486 | IADIZA:CEI:21660 | Jensen-Haarup, 1910 |
| *B. lonae* | -37.88067 | -67.835 | IADIZA:CEI:4910 | Jensen-Haarup, 1910 |
| *B. lonae* | -41.96834 | -71.53555 | Nègre, 1973 | Jensen-Haarup, 1910 |
| *B. lonae* | -41.85069 | -70.9027 | IADIZA | Jensen-Haarup, 1910 |
| *B. lonae* | -46.28809 | -69.34189 | IADIZA:CEI:10432 | Jensen-Haarup, 1910 |
| *B. lonae* | -43.2939 | -71.42266 | IADIZA:CEI:10412 | Jensen-Haarup, 1910 |
| *B. lonae* | -44.04832 | -68.60651 | IADIZA:CEI:10463 | Jensen-Haarup, 1910 |
| *B. lonae* | -44.65089 | -66.66973 | IADIZA:CEI:10459 | Jensen-Haarup, 1910 |
| *B. lonae* | -43.72139 | -67.2807 | IADIZA:CEI:10433 | Jensen-Haarup, 1910 |
| *B. lonae* | -45.83076 | -69.05186 | IADIZA:CEI:10403 | Jensen-Haarup, 1910 |
| *B. lonae* | -44.82811 | -69.2226 | IADIZA:CEI:10379 | Jensen-Haarup, 1910 |
| *B. lonae* | -43.76728 | -70.14129 | IADIZA:CEI:10428 | Jensen-Haarup, 1910 |
| *B. lonae* | -37.29306 | -69.69114 | IADIZA:CEI:4946 | Jensen-Haarup, 1910 |
| *B. lonae* | -40.03333 | -71.58333 | IADIZA | Jensen-Haarup, 1910 |
| *B. lonae* | -37.37809 | -70.27068 | IADIZA | Jensen-Haarup, 1910 |
| *B. lonae* | -27.3666 | -70.3333 | IADIZA | Jensen-Haarup, 1910 |
| *B. lonae* | -26.39582 | -69.52385 | IADIZA:CEI:4947 | Jensen-Haarup, 1910 |
| *B. lonae* | -27 | -69.96667 | Jeannel, 1962 | Jensen-Haarup, 1910 |
| *B. lonae* | -29.9533 | -71.3436 | Solier, 1849 | Jensen-Haarup, 1910 |
| *B. lonae* | -30.204 | -70.0067 | Jeannel, 1962 | Jensen-Haarup, 1910 |
| *B. lonae* | -33.3666 | -71.6666 | Jeannel, 1962 | Jensen-Haarup, 1910 |
| *B. lonae* | -33.5333 | -71.6 | IADIZA | Jensen-Haarup, 1910 |
| *B. lonae* | -34.7666 | -72.05 | IADIZA | Jensen-Haarup, 1910 |
| *B. lonae* | -33.4 | -70.7333 | Jeannel, 1962 | Jensen-Haarup, 1910 |
| *B. mendocinus* | -28.23817 | -67.45817 | IADIZA:CEI:4021 | Jensen-Haarup, 1910 |
| *B. mendocinus* | -28.46957 | -65.78524 | MACN | Jensen-Haarup, 1910 |
| *B. mendocinus* | -27.22896 | -66.83131 | MACN | Jensen-Haarup, 1910 |
| *B. mendocinus* | -32.06353 | -64.5404 | IADIZA | Jensen-Haarup, 1910 |
| *B. mendocinus* | -23.74739 | -65.50118 | MLP | Jensen-Haarup, 1910 |
| *B. mendocinus* | -34.97015 | -69.67475 | IADIZA:CEI:23123 | Jensen-Haarup, 1910 |
| *B. mendocinus* | -36.72148 | -69.85705 | IADIZA:CEI:3970 | Jensen-Haarup, 1910 |
| *B. mendocinus* | -32.67 | -69.3652 | IADIZA:CEI:3986 | Jensen-Haarup, 1910 |
| *B. mendocinus* | -32.59042 | -69.35138 | IADIZA:CEI:4016 | Jensen-Haarup, 1910 |
| *B. mendocinus* | -32.915 | -69.2375 | IADIZA:CEI:3953 | Jensen-Haarup, 1910 |
| *B. mendocinus* | -35.28582 | -68.24319 | IADIZA:CEI:3971 | Jensen-Haarup, 1910 |
| *B. mendocinus* | -32.8753 | -68.8448 | Jeannel, 1962 | Jensen-Haarup, 1910 |
| *B. mendocinus* | -32.93667 | -69.21517 | IADIZA:CEI:3966 | Jensen-Haarup, 1910 |
| *B. mendocinus* | -32.90748 | -69.2335 | IADIZA:CEI:3987 | Jensen-Haarup, 1910 |
| *B. mendocinus* | -32.6701 | -69.3652 | IADIZA | Jensen-Haarup, 1910 |
| *B. mendocinus* | -32.66667 | -69.51667 | IADIZA:CEI:3969 | Jensen-Haarup, 1910 |
| *B. mendocinus* | -34.58294 | -68.54525 | IADIZA | Jensen-Haarup, 1910 |
| *B. mendocinus* | -33.12056 | -65.90806 | IADIZA:CEI:3985 | Jensen-Haarup, 1910 |
| *B. mendocinus* | -33.01667 | -66.06694 | IADIZA:CEI:21636 | Jensen-Haarup, 1910 |
| *B. mendocinus* | -32.58533 | -64.95017 | IADIZA:CEI:5272 | Jensen-Haarup, 1910 |
| *B. mendocinus* | -32.66083 | -66.12617 | IADIZA:CEI:5675 | Jensen-Haarup, 1910 |
| *B. mendocinus* | -32.7725 | -65.36778 | IADIZA:CEI:21637 | Jensen-Haarup, 1910 |
| *B. mendocinus* | -33.11944 | -65.91194 | IADIZA:CEI:3978 | Jensen-Haarup, 1910 |
| *B. mendocinus* | -33.13333 | -66.51667 | IADIZA | Jensen-Haarup, 1910 |
| *B. mendocinus* | -33.08417 | -66.05417 | IADIZA:CEI:3983 | Jensen-Haarup, 1910 |
| *B. mendocinus* | -33.01917 | -66.28333 | IADIZA:CEI:3982 | Jensen-Haarup, 1910 |
| *B. mendocinus* | -39.2426 | -70.0765 | IADIZA | Jensen-Haarup, 1910 |
| *B. mendocinus* | -40.21667 | -71.25 | IADIZA:CEI:4230 | Jensen-Haarup, 1910 |
| *B. mendocinus* | -40.71595 | -71.03604 | IADIZA:CEI:5273 | Jensen-Haarup, 1910 |
| *B. mendocinus* | -39.20331 | -70.1043 | IADIZA | Jensen-Haarup, 1910 |
| *B. mendocinus* | -40.00113 | -70.83369 | IADIZA:CEI:4035 | Jensen-Haarup, 1910 |
| *B. mendocinus* | -40.91667 | -71.08333 | IADIZA:CEI:4017 | Jensen-Haarup, 1910 |
| *B. mirasoi* | -34.632 | -58.436 | MNHN | Jensen-Haarup, 1910 |
| *B. mirasoi* | -31.21667 | -64.36667 | FCUNCo | Jensen-Haarup, 1910 |
| *B. mirasoi* | -32.21667 | -65.05 | FCUNCo | Jensen-Haarup, 1910 |
| *B. mirasoi* | -32.95746 | -68.67101 | Jensen-Haarup, 1910 | Jensen-Haarup, 1910 |
| *B. mirasoi* | -41.96834 | -71.53555 | MNHN | Jensen-Haarup, 1910 |
| *B. mirasoi* | -28.75 | -62.45 | Jeannel, 1962 | Jensen-Haarup, 1910 |
| *B. mirasoi* | -42.06667 | -71.5 | MNHN | Jensen-Haarup, 1910 |
| *B. mirasoi* | -33.0477 | -71.6011 | IADIZA | Jensen-Haarup, 1910 |
| *B. mirasoi* | -36.8333 | -73.05 | IADIZA | Jensen-Haarup, 1910 |
| *B. mirasoi* | -34.89343 | -56.15546 | MLP | Jensen-Haarup, 1910 |
| *B. negreanum* | -35.31961 | -70.33383 | IADIZA:CEI:10231 | Say, 1823 |
| *B. negreanum* | -41.85069 | -70.9027 | Nègre, 1973 | Say, 1823 |
| *B. negreanum* | -36.81792 | -71.073 | IADIZA:CEI:5636 | Say, 1823 |
| *B. neodelamarei* | -22.92641 | -65.3655 | MACN | Toledano, 2008 |
| *B. neodelamarei* | -29.52967 | -68.49833 | IADIZA:CEI:4059 | Toledano, 2008 |
| *B. neodelamarei* | -32.83278 | -69.33093 | IADIZA:CEI:4070 | Toledano, 2008 |
| *B. neodelamarei* | -32.58974 | -69.35094 | IADIZA:CEI:4067 | Toledano, 2008 |
| *B. neodelamarei* | -32.89843 | -68.9372 | IADIZA:CEI:5584 | Toledano, 2008 |
| *B. neodelamarei* | -32.5605 | -69.3425 | IADIZA:CEI:4071 | Toledano, 2008 |
| *B. neodelamarei* | -32.59042 | -69.35138 | IADIZA:CEI:4069 | Toledano, 2008 |
| *B. neodelamarei* | -32.90748 | -69.2335 | IADIZA:CEI:4064 | Toledano, 2008 |
| *B. neodelamarei* | -32.6914 | -69.517 | IADIZA:CEI:5581 | Toledano, 2008 |
| *B. neodelamarei* | -26.05 | -65.88333 | IADIZA:CEI:5571 | Toledano, 2008 |
| *B. neodelamarei* | -25.46642 | -65.5663 | IADIZA:CEI:5577 | Toledano, 2008 |
| *B. neodelamarei* | -26.50133 | -65.40819 | Jeannel, 1962 | Toledano, 2008 |
| *B. neodelamarei* | -27.3198 | -65.9063 | IADIZA:CEI:5628 | Toledano, 2008 |
| *B. neodelamarei* | -39.98333 | -70.01667 | IADIZA:CEI:5583 | Toledano, 2008 |
| *B. neodelamarei* | -17.46523 | -68.96323 | Toledano, 2008 | Toledano, 2008 |
| *B. neodelamarei* | -18.13174 | -63.64501 | Toledano, 2008 | Toledano, 2008 |
| *B. neodelamarei* | -18.51544 | -70.18703 | IADIZA | Toledano, 2008 |
| *B. neodelamarei* | -35.51669 | -70.4491 | IADIZA:CEI:10240 | Toledano, 2008 |
| *B. neodelamarei* | -33.74269 | -70.45289 | Solervicens Alessandri, 2014 | Toledano, 2008 |
| *B. nigrita* | -41.08414 | -71.46158 | Bruch, 1911 | Solier, 1849 |
| *B. nigrita* | -40.56582 | -71.69765 | Victoria Venkerauk | Solier, 1849 |
| *B. nigrita* | -40.56582 | -71.69765 | Victoria Venkerauk | Solier, 1849 |
| *B. nigrita* | -40.56582 | -71.69765 | Victoria Venkerauk | Solier, 1849 |
| *B. nigrita* | -40.56582 | -71.69765 | Victoria Venkerauk | Solier, 1849 |
| *B. nigrita* | -40.56282 | -71.69852 | Victoria Venkerauk | Solier, 1849 |
| *B. nigrita* | -40.56282 | -71.69852 | Victoria Venkerauk | Solier, 1849 |
| *B. nigrita* | -40.55792 | -71.69777 | Victoria Venkerauk | Solier, 1849 |
| *B. nigrita* | -40.55792 | -71.69777 | Victoria Venkerauk | Solier, 1849 |
| *B. nigrita* | -38.05 | -71.71667 | MHNS | Solier, 1849 |
| *B. nigrita* | -41.8697 | -73.8202 | Jeannel, 1962 | Solier, 1849 |
| *B. nigrita* | -41.78 | -73.139 | Solier, 1849 | Solier, 1849 |
| *B. nigrita* | -40.7 | -72.3 | IADIZA | Solier, 1849 |
| *B. nigrita* | -39.8352 | -73.4021 | Solier, 1849 | Solier, 1849 |
| *B. nigrita* | -36.85 | -71.4 | Jeannel, 1962 | Solier, 1849 |
| *B. olivieri* | -41.15 | -71.3 | IADIZA:CEI:5807 | Jeannel, 1962 |
| *B. olivieri* | -41.96834 | -71.53555 | MNHN | Jeannel, 1962 |
| *B. olivieri* | -50.1838 | -72.8645 | IADIZA:CEI:5818 | Jeannel, 1962 |
| *B. olivieri* | -54.21667 | -67.2 | IADIZA:CEI:5819 | Jeannel, 1962 |
| *B. olivieri* | -53.86667 | -67.78333 | IADIZA:CEI:5707 | Jeannel, 1962 |
| *B. olivieri* | -42.06667 | -71.5 | MNHN | Jeannel, 1962 |
| *B. olivieri* | -43.76728 | -70.14129 | IADIZA:CEI:10489 | Jeannel, 1962 |
| *B. olivieri* | -40.82456 | -71.56472 | IADIZA | Jeannel, 1962 |
| *B. olivieri* | -39.98626 | -71.08807 | IADIZA | Jeannel, 1962 |
| *B. olivieri* | -51.35 | -72.65 | Jeannel, 1962 | Jeannel, 1962 |
| *B. olivieri* | -54.031 | -68.91338 | MNHN | Jeannel, 1962 |
| *B. orregoi* | -41.85069 | -70.9027 | MNHN | Germain, 1906 |
| *B. orregoi* | -42.50146 | -71.097 | IADIZA | Germain, 1906 |
| *B. orregoi* | -42.0959 | -71.6244 | IADIZA:CEI:4041 | Germain, 1906 |
| *B. orregoi* | -42.09333 | -71.6221 | IADIZA:CEI:5268 | Germain, 1906 |
| *B. orregoi* | -40.1015 | -70.7545 | IADIZA | Germain, 1906 |
| *B. orregoi* | -39.3998 | -70.9315 | IADIZA | Germain, 1906 |
| *B. orregoi* | -40.03333 | -71.58333 | IADIZA:CEI:5271 | Germain, 1906 |
| *B. orregoi* | -39.75 | -70.61667 | IADIZA:CEI:5269 | Germain, 1906 |
| *B. orregoi* | -37.37809 | -70.27068 | IADIZA:CEI:4048 | Germain, 1906 |
| *B. orregoi* | -40.16667 | -71.35 | IADIZA:CEI:5267 | Germain, 1906 |
| *B. orregoi* | -45.9166 | -71.6833 | Jeannel, 1962 | Germain, 1906 |
| *B. orregoi* | -52.819 | -70.849 | Germain, 1906 | Germain, 1906 |
| *B. orregoi* | -51.12417 | -73.12963 | IADIZA:CEI:4051 | Germain, 1906 |
| *B. pallideguttula* | -34.88333 | -57.9 | Paleologos, 2010 | Jensen-Haarup, 1910 |
| *B. pallideguttula* | -37.61778 | -57.42111 | Castro, 2014 | Jensen-Haarup, 1910 |
| *B. pallideguttula* | -34.60224 | -61.91296 | MACN | Jensen-Haarup, 1910 |
| *B. pallideguttula* | -34.17928 | -58.25245 | Cicchino & Scampani, 2000 | Jensen-Haarup, 1910 |
| *B. pallideguttula* | -37.93333 | -57.73333 | Cicchino et al. 2010 | Jensen-Haarup, 1910 |
| *B. pallideguttula* | -37.63123 | -57.43198 | Cicchino, 2006b | Jensen-Haarup, 1910 |
| *B. pallideguttula* | -37.66667 | -57.41667 | Canepuccia et al., 2009 | Jensen-Haarup, 1910 |
| *B. pallideguttula* | -35.6 | -59.81667 | Cicchino & Storti, 2007 | Jensen-Haarup, 1910 |
| *B. pallideguttula* | -35.42945 | -57.15195 | Cicchino, 2009 | Jensen-Haarup, 1910 |
| *B. pallideguttula* | -33.6834 | -59.6653 | MACN | Jensen-Haarup, 1910 |
| *B. pallideguttula* | -32.68694 | -64.71389 | IADIZA:CEI:21661 | Jensen-Haarup, 1910 |
| *B. pallideguttula* | -30.73717 | -64.79717 | CJEB | Jensen-Haarup, 1910 |
| *B. pallideguttula* | -30.76944 | -66.41417 | IADIZA:CEI:5456 | Jensen-Haarup, 1910 |
| *B. pallideguttula* | -32.88333 | -68.81667 | Jensen-Haarup, 1910 | Jensen-Haarup, 1910 |
| *B. pallideguttula* | -32.79431 | -68.58784 | IADIZA:CEI:22740 | Jensen-Haarup, 1910 |
| *B. pallideguttula* | -32.82009 | -68.61109 | IADIZA:CEI:22736 | Jensen-Haarup, 1910 |
| *B. pallideguttula* | -32.83999 | -68.60151 | IADIZA:CEI:22737 | Jensen-Haarup, 1910 |
| *B. pallideguttula* | -32.58533 | -64.95017 | IADIZA:CEI:5477 | Jensen-Haarup, 1910 |
| *B. pallideguttula* | -33.40444 | -67.15139 | IADIZA:CEI:5476 | Jensen-Haarup, 1910 |
| *B. pallideguttula* | -28.4833 | -59.6166 | MNHN | Jensen-Haarup, 1910 |
| *B. pallideguttula* | -28.6833 | -62.9 | Jeannel, 1962 | Jensen-Haarup, 1910 |
| *B. philippii* | -41.96834 | -71.53555 | Nègre, 1973 | Germain, 1906 |
| *B. philippii* | -43.72139 | -67.2807 | IADIZA:CEI:11292 | Germain, 1906 |
| *B. philippii* | -45.83076 | -69.05186 | IADIZA:CEI:11289 | Germain, 1906 |
| *B. philippii* | -42.0933 | -71.6221 | IADIZA | Germain, 1906 |
| *B. philippii* | -40.15504 | -71.3533 | IADIZA:CEI:5630 | Germain, 1906 |
| *B. philippii* | -39.3998 | -70.9315 | IADIZA | Germain, 1906 |
| *B. philippii* | -40.03333 | -71.58333 | IADIZA:CEI:5595 | Germain, 1906 |
| *B. philippii* | -37.37809 | -70.27068 | IADIZA:CEI:5597 | Germain, 1906 |
| *B. philippii* | -40.1015 | -70.7545 | Maddison, 2014 | Germain, 1906 |
| *B. philippii* | -39.7506 | -71.1121 | IADIZA | Germain, 1906 |
| *B. philippii* | -35.3333 | -72.4166 | Germain, 1906 | Germain, 1906 |
| *B. posticalis* | -34.91667 | -57.83368 | Paleologos, 2012 | Germain, 1906 |
| *B. posticalis* | -35.6 | -59.81667 | Cicchino & Storti, 2007 | Germain, 1906 |
| *B. posticalis* | -35.42945 | -57.15195 | Cicchino, 2009 | Germain, 1906 |
| *B. posticalis* | -40.89423 | -65.14282 | IADIZA | Germain, 1906 |
| *B. posticalis* | -41.15 | -71.3 | IADIZA:CEI:5170 | Germain, 1906 |
| *B. posticalis* | -41.96834 | -71.53555 | Nègre, 1973 | Germain, 1906 |
| *B. posticalis* | -41.96667 | -71.51667 | IADIZA:CEI:5210 | Germain, 1906 |
| *B. posticalis* | -41.51111 | -71.54167 | IADIZA:CEI:5235 | Germain, 1906 |
| *B. posticalis* | -41.50667 | -71.50667 | IADIZA:CEI:5780 | Germain, 1906 |
| *B. posticalis* | -41.85069 | -70.9027 | Nègre, 1973 | Germain, 1906 |
| *B. posticalis* | -41.13333 | -70.85 | IADIZA:CEI:5157 | Germain, 1906 |
| *B. posticalis* | -49.36184 | -69.68728 | IADIZA:CEI:22747 | Germain, 1906 |
| *B. posticalis* | -54.21667 | -67.2 | IADIZA:CEI:5830 | Germain, 1906 |
| *B. posticalis* | -43.2939 | -71.42266 | IADIZA:CEI:10487 | Germain, 1906 |
| *B. posticalis* | -42.06667 | -71.5 | Nègre, 1973 | Germain, 1906 |
| *B. posticalis* | -42.25 | -71.68333 | IADIZA:CEI:5208 | Germain, 1906 |
| *B. posticalis* | -43.72139 | -67.2807 | IADIZA:CEI:10481 | Germain, 1906 |
| *B. posticalis* | -43.76728 | -70.14129 | IADIZA:CEI:10488 | Germain, 1906 |
| *B. posticalis* | -39.57028 | -71.44083 | IADIZA:CEI:5216 | Germain, 1906 |
| *B. posticalis* | -40.03333 | -71.58333 | IADIZA:CEI:5190 | Germain, 1906 |
| *B. posticalis* | -40.15 | -71.7166 | IADIZA:CEI:5786 | Germain, 1906 |
| *B. posticalis* | -40.16056 | -71.72 | IADIZA:CEI:5787 | Germain, 1906 |
| *B. posticalis* | -40.00113 | -70.83369 | IADIZA:CEI:5223 | Germain, 1906 |
| *B. posticalis* | -38.89554 | -69.7866 | IADIZA:CEI:22302 | Germain, 1906 |
| *B. posticalis* | -40.15504 | -71.3533 | IADIZA:CEI:21691 | Germain, 1906 |
| *B. posticalis* | -39.98333 | -71.08333 | IADIZA:CEI:5785 | Germain, 1906 |
| *B. posticalis* | -46.55 | -71.7333 | Jeannel, 1962 | Germain, 1906 |
| *B. posticalis* | -38.2333 | -71.7 | Jeannel, 1962 | Germain, 1906 |
| *B. posticalis* | -42.5 | -73.9166 | IADIZA | Germain, 1906 |
| *B. posticalis* | -41.12 | -72.822 | IADIZA:CEI:22848 | Germain, 1906 |
| *B. posticalis* | -41.42 | -72.81727 | IADIZA | Germain, 1906 |
| *B. posticalis* | -33.3666 | -71.6666 | Jeannel, 1962 | Germain, 1906 |
| *B. posticalis* | -36.8166 | -73.1666 | Germain, 1906 | Germain, 1906 |
| *B. posticalis* | -33.88333 | -70.88333 | Germain, 1911 | Germain, 1906 |
| *B. posticalis* | -33.45 | -70.66667 | IADIZA | Germain, 1906 |
| *B. punctigerum* | -35.5323 | -70.00731 | IADIZA:CEI:23150 | Solier, 1849 |
| *B. punctigerum* | -35.60228 | -68.51308 | IADIZA:CEI:3806 | Solier, 1849 |
| *B. punctigerum* | -35.59801 | -68.50957 | IADIZA:CEI:3807 | Solier, 1849 |
| *B. punctigerum* | -34.19653 | -69.53567 | IADIZA:CEI:3917 | Solier, 1849 |
| *B. punctigerum* | -34.21081 | -69.70783 | IADIZA:CEI:3794 | Solier, 1849 |
| *B. punctigerum* | -34.24467 | -69.51022 | IADIZA:CEI:3805 | Solier, 1849 |
| *B. punctigerum* | -35.94954 | -69.41197 | IADIZA:CEI:23159 | Solier, 1849 |
| *B. punctigerum* | -36.37759 | -69.21978 | IADIZA:CEI:15213 | Solier, 1849 |
| *B. punctigerum* | -41.50667 | -71.53833 | IADIZA:CEI:4185 | Solier, 1849 |
| *B. punctigerum* | -46.28809 | -69.34189 | IADIZA:CEI:11308 | Solier, 1849 |
| *B. punctigerum* | -37.26528 | -70.5225 | IADIZA:CEI:3812 | Solier, 1849 |
| *B. punctigerum* | -40.15504 | -71.3533 | IADIZA:CEI:4195 | Solier, 1849 |
| *B. punctigerum* | -39.57028 | -71.44083 | IADIZA:CEI:3815 | Solier, 1849 |
| *B. punctigerum* | -36.81792 | -71.073 | IADIZA:CEI:3810 | Solier, 1849 |
| *B. punctigerum* | -40.03333 | -71.58333 | IADIZA:CEI:3839 | Solier, 1849 |
| *B. punctigerum* | -39.8 | -71.58333 | IADIZA:CEI:3840 | Solier, 1849 |
| *B. punctigerum* | -40.00113 | -70.83369 | IADIZA:CEI:3813 | Solier, 1849 |
| *B. punctigerum* | -23.36667 | -67.85 | IADIZA:CEI:3842 | Solier, 1849 |
| *B. punctigerum* | -23.35 | -67.8 | IADIZA:CEI:5696 | Solier, 1849 |
| *B. punctigerum* | -20.28113 | -68.88504 | IADIZA:CEI:21629 | Solier, 1849 |
| *B. resignatum* | -35.59801 | -68.50957 | IADIZA | Erichson, 1847 |
| *B. resignatum* | -35.60228 | -68.51308 | IADIZA | Erichson, 1847 |
| *B. resignatum* | -34.21081 | -69.70783 | IADIZA | Erichson, 1847 |
| *B. resignatum* | -34.24013 | -69.50633 | IADIZA | Erichson, 1847 |
| *B. resignatum* | -41.96834 | -71.53555 | MNHN | Erichson, 1847 |
| *B. resignatum* | -42.06667 | -71.5 | AMNH | Erichson, 1847 |
| *B. resignatum* | -40.03333 | -71.58333 | IADIZA | Erichson, 1847 |
| *B. resignatum* | -39.8 | -71.58333 | IADIZA | Erichson, 1847 |
| *B. resignatum* | -40.00113 | -70.83369 | IADIZA | Erichson, 1847 |
| *B. resignatum* | -16.69701 | -67.78338 | Toledano, 2008 | Erichson, 1847 |
| *B. resignatum* | -15.77336 | -68.6487 | Toledano, 2008 | Erichson, 1847 |
| *B. resignatum* | -18.13648 | -68.9773 | Toledano, 2008 | Erichson, 1847 |
| *B. resignatum* | -22.35 | -68.65 | IADIZA | Erichson, 1847 |
| *B. resignatum* | -23.3666 | -67.85 | IADIZA | Erichson, 1847 |
| *B. resignatum* | -23.1833 | -68.0166 | Toledano, 2008 | Erichson, 1847 |
| *B. resignatum* | -18.3691 | -69.35868 | Toledano, 2008 | Erichson, 1847 |
| *B. resignatum* | -29.9533 | -71.3436 | Solier, 1849 | Erichson, 1847 |
| *B. resignatum* | -30.204 | -70.0067 | Jeannel, 1962 | Erichson, 1847 |
| *B. resignatum* | -30.5983 | -71.2002 | Solier, 1849 | Erichson, 1847 |
| *B. resignatum* | -41.25 | -73.0166 | MNHN | Erichson, 1847 |
| *B. resignatum* | -33.63333 | -78.86667 | Jeannel, 1962 | Erichson, 1847 |
| *B. resignatum* | -32.8308 | -70.12762 | Toledano, 2008 | Erichson, 1847 |
| *B. resignatum* | -33.0477 | -71.6011 | MNHN | Erichson, 1847 |
| *B. resignatum* | -36.85 | -71.4 | Jeannel, 1962 | Erichson, 1847 |
| *B. resignatum* | -33.88333 | -70.88333 | Reed, 1874 | Erichson, 1847 |
| *B. resignatum* | -15.63864 | -71.60066 | Toledano, 2008 | Erichson, 1847 |
| *B. resignatum* | -16.29653 | -70.72267 | Toledano, 2008 | Erichson, 1847 |
| *B. resignatum* | -15.72144 | -70.1563 | Toledano, 2008 | Erichson, 1847 |
| *B. ringueleti* | -30.05 | -66.8833 | MNHN | Jeannel, 1962 |
| *B. ringueleti* | -32.83278 | -69.33093 | IADIZA:CEI:4085 | Jeannel, 1962 |
| *B. ringueleti* | -32.64469 | -69.19728 | IADIZA:CEI:4129 | Jeannel, 1962 |
| *B. ringueleti* | -32.34197 | -69.43119 | IADIZA:CEI:21605 | Jeannel, 1962 |
| *B. ringueleti* | -34.88254 | -68.56731 | IADIZA:CEI:4086 | Jeannel, 1962 |
| *B. ringueleti* | -32.49311 | -69.36694 | IADIZA:CEI:4084 | Jeannel, 1962 |
| *B. ringueleti* | -32.81667 | -69.95 | IADIZA:CEI:5703 | Jeannel, 1962 |
| *B. ringueleti* | -32.50222 | -69.05553 | IADIZA:CEI:4087 | Jeannel, 1962 |
| *B. ringueleti* | -32.93333 | -69.05456 | IADIZA:CEI:4095 | Jeannel, 1962 |
| *B. ringueleti* | -32.537 | -69.43517 | IADIZA:CEI:4226 | Jeannel, 1962 |
| *B. ringueleti* | -32.66667 | -69.5 | IADIZA:CEI:4082 | Jeannel, 1962 |
| *B. ringueleti* | -41.15 | -71.3 | IADIZA:CEI:4083 | Jeannel, 1962 |
| *B. ringueleti* | -41.85069 | -70.9027 | Nègre, 1973 | Jeannel, 1962 |
| *B. ringueleti* | -41.58686 | -71.49117 | FIML | Jeannel, 1962 |
| *B. ringueleti* | -31.96389 | -69.13583 | IADIZA:CEI:21166 | Jeannel, 1962 |
| *B. ringueleti* | -31.79597 | -69.33367 | IADIZA | Jeannel, 1962 |
| *B. ringueleti* | -18.51544 | -70.18703 | IADIZA:CEI:21128 | Jeannel, 1962 |
| *B. ringueleti* | -17.83879 | -69.70713 | IADIZA:CEI:21171 | Jeannel, 1962 |
| *B. ringueleti* | -19.01558 | -69.33839 | IADIZA:CEI:21170 | Jeannel, 1962 |
| *B. ringueleti* | -35.47636 | -70.9943 | IADIZA:CEI:21127 | Jeannel, 1962 |
| *B. ringueleti* | -35.19401 | -71.11359 | IADIZA | Jeannel, 1962 |
| *B. rufoplagiatus* | -30.05 | -66.88333 | IADIZA:CEI:11302 | Germain, 1906 |
| *B. rufoplagiatus* | -32.28859 | -69.5058 | IADIZA:CEI:5654 | Germain, 1906 |
| *B. rufoplagiatus* | -32.64469 | -69.19728 | IADIZA:CEI:5652 | Germain, 1906 |
| *B. rufoplagiatus* | -33.011 | -69.12217 | IADIZA:CEI:5691 | Germain, 1906 |
| *B. rufoplagiatus* | -33.34767 | -69.431 | IADIZA:CEI:5655 | Germain, 1906 |
| *B. rufoplagiatus* | -41.15 | -71.3 | IADIZA:CEI:5812 | Germain, 1906 |
| *B. rufoplagiatus* | -41.50667 | -71.53833 | IADIZA:CEI:4213 | Germain, 1906 |
| *B. rufoplagiatus* | -41.85069 | -70.9027 | IADIZA:CEI:5649 | Germain, 1906 |
| *B. rufoplagiatus* | -44.5617 | -66.0028 | IADIZA:CEI:11300 | Germain, 1906 |
| *B. rufoplagiatus* | -43.72139 | -67.2807 | IADIZA:CEI:11301 | Germain, 1906 |
| *B. rufoplagiatus* | -45.82572 | -69.06174 | IADIZA:CEI:11296 | Germain, 1906 |
| *B. rufoplagiatus* | -45.83076 | -69.05186 | IADIZA:CEI:11298 | Germain, 1906 |
| *B. rufoplagiatus* | -37.26528 | -70.5225 | IADIZA:CEI:5598 | Germain, 1906 |
| *B. rufoplagiatus* | -40.15504 | -71.3533 | IADIZA:CEI:5653 | Germain, 1906 |
| *B. rufoplagiatus* | -39.57028 | -71.44083 | IADIZA:CEI:4055 | Germain, 1906 |
| *B. rufoplagiatus* | -40.03333 | -71.58333 | IADIZA:CEI:4339 | Germain, 1906 |
| *B. rufoplagiatus* | -39.8 | -71.5833 | IADIZA:CEI:4388 | Germain, 1906 |
| *B. rufoplagiatus* | -40.48333 | -71.35 | IADIZA:CEI:4390 | Germain, 1906 |
| *B. rufoplagiatus* | -40.0801 | -71.3232 | IADIZA:CEI:4281 | Germain, 1906 |
| *B. rufoplagiatus* | -40.72125 | -71.79674 | IADIZA:CEI:5625 | Germain, 1906 |
| *B. rufoplagiatus* | -40.15 | -71.7166 | IADIZA:CEI:5646 | Germain, 1906 |
| *B. rufoplagiatus* | -38.21681 | -70.25262 | IADIZA:CEI:4265 | Germain, 1906 |
| *B. rufoplagiatus* | -40.16056 | -71.72 | IADIZA:CEI:4050 | Germain, 1906 |
| *B. rufoplagiatus* | -40.00113 | -70.83369 | IADIZA:CEI:5620 | Germain, 1906 |
| *B. scitulum* | -41.17 | -71.43469 | IADIZA:CEI:3862 | Dejean,1831 |
| *B. scitulum* | -41.21667 | -71.5 | IADIZA:CEI:5638 | Dejean,1831 |
| *B. scitulum* | -40.18333 | -71.63333 | MLP | Dejean,1831 |
| *B. scitulum* | -40.15504 | -71.3533 | IADIZA:CEI:4229 | Dejean,1831 |
| *B. scitulum* | -33.3666 | -71.6666 | Jeannel, 1962 | Dejean,1831 |
| *B. scitulum* | -32.98333 | -71.16667 | IADIZA | Dejean,1831 |
| *B. scitulum* | -33.0666 | -71.0333 | IADIZA:CEI:5694 | Dejean,1831 |
| *B. scitulum* | -32.93333 | -71.56667 | IADIZA | Dejean,1831 |
| *B. scitulum* | -33.15 | -71.31667 | MZUC | Dejean,1831 |
| *B. scitulum* | -32.76667 | -71.05 | IADIZA | Dejean,1831 |
| *B. scitulum* | -32.88333 | -71.26667 | Jeannel, 1962 | Dejean,1831 |
| *B. scitulum* | -34.3833 | -72 | IADIZA | Dejean,1831 |
| *B. scitulum* | -35.30754 | -70.8684 | IADIZA:CEI:21132 | Dejean,1831 |
| *B. scitulum* | -35.06208 | -71.16449 | Maddison, 2014 | Dejean,1831 |
| *B. scitulum* | -35.01667 | -70.8 | IADIZA:CEI:21141 | Dejean,1831 |
| *B. scitulum* | -33.07239 | -70.8663 | IADIZA | Dejean,1831 |
| *B. scitulum* | -33.74269 | -70.45289 | Solervicens Alessandri, 2014 | Dejean,1831 |
| *B. scitulum* | -33.28333 | -70.66667 | Solier, 1849 | Dejean,1831 |
| *B. scitulum* | -33.45 | -70.6666 | MNHN | Dejean,1831 |
| *B. sexfoveolatum* | -41.10299 | -71.56375 | IADIZA:CEI:3370 | Germain, 1906 |
| *B. sexfoveolatum* | -41.1018 | -71.55897 | IADIZA:CEI:3325 | Germain, 1906 |
| *B. sexfoveolatum* | -40.03333 | -71.58333 | IADIZA | Germain, 1906 |
| *B. sexfoveolatum* | -40.56582 | -71.69765 | IADIZA:CEI:3261 | Germain, 1906 |
| *B. sexfoveolatum* | -40.56282 | -71.69852 | IADIZA:CEI:3255 | Germain, 1906 |
| *B. sexfoveolatum* | -40.55792 | -71.69777 | IADIZA:CEI:3269 | Germain, 1906 |
| *B. sexfoveolatum* | -40.13136 | -71.19942 | IADIZA:CEI:4181 | Germain, 1906 |
| *B. sexfoveolatum* | -38.52877 | -71.40235 | Maddison, 2014 | Germain, 1906 |
| *B. sexfoveolatum* | -33.88333 | -70.88333 | Reed, 1874 | Germain, 1906 |
| *B. sexfoveolatum* | -33.34058 | -70.29195 | IADIZA:CEI:5695 | Germain, 1906 |
| *B. sexfoveolatum* | -33.8 | -70.05 | Jeannel, 1962 | Germain, 1906 |
| *B. sexfoveolatum* | -33.74269 | -70.45289 | Solervicens Alessandri, 2014 | Germain, 1906 |
| *B. aff. sexfoveatum* | -40.56582 | -71.69765 | IADIZA | Roig-Juñent det |
| *B. aff. sexfoveatum* | -40.56282 | -71.69852 | IADIZA | Roig-Juñent det |
| *B. aff. sexfoveatum* | -40.55792 | -71.69777 | IADIZA | Roig-Juñent det |
| *B. aff. sexfoveatum* | -41.10299 | -71.56375 | IADIZA | Roig-Juñent det |
| *B. solieri* | -37.91667 | -58.33333 | IADIZA:CEI:3870 | Gemminger and Harold, 1868 |
| *B. solieri* | -37.93333 | -57.73333 | Cicchino, 2006a | Gemminger and Harold, 1868 |
| *B. solieri* | -37.63123 | -57.43198 | Cicchino, 2006b | Gemminger and Harold, 1868 |
| *B. solieri* | -34.91667 | -57.83368 | Paleologos, 2012 | Gemminger and Harold, 1868 |
| *B. solieri* | -35.6 | -59.81667 | Cicchino & Storti, 2007 | Gemminger and Harold, 1868 |
| *B. solieri* | -35.42945 | -57.15195 | Cicchino, 2009 | Gemminger and Harold, 1868 |
| *B. solieri* | -34.4721 | -58.51339 | IADIZA:CEI:3951 | Gemminger and Harold, 1868 |
| *B. solieri* | -26.51667 | -67.41328 | IADIZA:CEI:5248 | Gemminger and Harold, 1868 |
| *B. solieri* | -32.06353 | -64.5404 | IADIZA | Gemminger and Harold, 1868 |
| *B. solieri* | -32.64469 | -69.19728 | IADIZA:CEI:3913 | Gemminger and Harold, 1868 |
| *B. solieri* | -32.88333 | -68.81667 | IADIZA | Gemminger and Harold, 1868 |
| *B. solieri* | -32.35026 | -69.49084 | IADIZA:CEI:21574 | Gemminger and Harold, 1868 |
| *B. solieri* | -32.31326 | -69.46613 | IADIZA:CEI:21577 | Gemminger and Harold, 1868 |
| *B. solieri* | -32.81667 | -69.95 | IADIZA:CEI:3868 | Gemminger and Harold, 1868 |
| *B. solieri* | -32.8063 | -69.9427 | IADIZA | Gemminger and Harold, 1868 |
| *B. solieri* | -34.04033 | -67.90567 | IADIZA:CEI:3952 | Gemminger and Harold, 1868 |
| *B. solieri* | -33.25 | -69.28333 | IADIZA:CEI:5249 | Gemminger and Harold, 1868 |
| *B. solieri* | -32.29167 | -69.51933 | IADIZA:CEI:3915 | Gemminger and Harold, 1868 |
| *B. solieri* | -40.8769 | -65.12166 | IADIZA:CEI:10338 | Gemminger and Harold, 1868 |
| *B. solieri* | -41.35167 | -71.60333 | IADIZA:CEI:21763 | Gemminger and Harold, 1868 |
| *B. solieri* | -41.10299 | -71.56375 | IADIZA:CEI:3337 | Gemminger and Harold, 1868 |
| *B. solieri* | -39.38227 | -65.69579 | FIML | Gemminger and Harold, 1868 |
| *B. solieri* | -37.8805 | -67.836 | IADIZA:CEI:4847 | Gemminger and Harold, 1868 |
| *B. solieri* | -41.96834 | -71.53555 | Nègre, 1973 | Gemminger and Harold, 1868 |
| *B. solieri* | -39.03333 | -67.58333 | IADIZA:CEI:5817 | Gemminger and Harold, 1868 |
| *B. solieri* | -40.56667 | -70.63333 | IADIZA:CEI:5155 | Gemminger and Harold, 1868 |
| *B. solieri* | -33.13333 | -66.51667 | IADIZA | Gemminger and Harold, 1868 |
| *B. solieri* | -32.73333 | -65.3 | IADIZA | Gemminger and Harold, 1868 |
| *B. solieri* | -46.28809 | -69.34189 | IADIZA:CEI:10340 | Gemminger and Harold, 1868 |
| *B. solieri* | -50.85806 | -71.49111 | IADIZA:CEI:21737 | Gemminger and Harold, 1868 |
| *B. solieri* | -51.25 | -72.23333 | IADIZA:CEI:4036 | Gemminger and Harold, 1868 |
| *B. solieri* | -50.1988 | -70.93063 | IADIZA:CEI:21090 | Gemminger and Harold, 1868 |
| *B. solieri* | -49.96498 | -73.13034 | FIML | Gemminger and Harold, 1868 |
| *B. solieri* | -51.68333 | -69.7 | IADIZA:CEI:3910 | Gemminger and Harold, 1868 |
| *B. solieri* | -49.36184 | -69.68728 | IADIZA:CEI:22750 | Gemminger and Harold, 1868 |
| *B. solieri* | -50.28661 | -70.16222 | IADIZA:CEI:21081 | Gemminger and Harold, 1868 |
| *B. solieri* | -54.16344 | -67.06244 | IADIZA:CEI:3055 | Gemminger and Harold, 1868 |
| *B. solieri* | -26.81667 | -65.21667 | Jeannel, 1962 | Gemminger and Harold, 1868 |
| *B. solieri* | -45.98045 | -69.7302 | IADIZA:CEI:10348 | Gemminger and Harold, 1868 |
| *B. solieri* | -45.7312 | -69.07088 | IADIZA:CEI:10330 | Gemminger and Harold, 1868 |
| *B. solieri* | -44.5617 | -66.0028 | IADIZA:CEI:10331 | Gemminger and Harold, 1868 |
| *B. solieri* | -44.82811 | -69.2226 | IADIZA:CEI:10355 | Gemminger and Harold, 1868 |
| *B. solieri* | -45.95 | -67.55 | FIML | Gemminger and Harold, 1868 |
| *B. solieri* | -42.06667 | -71.5 | IADIZA | Gemminger and Harold, 1868 |
| *B. solieri* | -42.25 | -71.68333 | IADIZA:CEI:21627 | Gemminger and Harold, 1868 |
| *B. solieri* | -44.98402 | -71.42113 | IADIZA:CEI:5816 | Gemminger and Harold, 1868 |
| *B. solieri* | -43.72139 | -67.2807 | IADIZA:CEI:10335 | Gemminger and Harold, 1868 |
| *B. solieri* | -45.83076 | -69.05186 | IADIZA:CEI:10349 | Gemminger and Harold, 1868 |
| *B. solieri* | -43.76728 | -70.14129 | IADIZA:CEI:10347 | Gemminger and Harold, 1868 |
| *B. solieri* | -40.15504 | -71.3533 | IADIZA:CEI:3908 | Gemminger and Harold, 1868 |
| *B. solieri* | -40.03333 | -71.58333 | IADIZA:CEI:5246 | Gemminger and Harold, 1868 |
| *B. solieri* | -40.16056 | -71.72 | IADIZA:CEI:3911 | Gemminger and Harold, 1868 |
| *B. solieri* | -40.15 | -71.56667 | IADIZA:CEI:3897 | Gemminger and Harold, 1868 |
| *B. solieri* | -40.00113 | -70.83369 | IADIZA:CEI:3949 | Gemminger and Harold, 1868 |
| *B. solieri* | -39.98626 | -71.08807 | IADIZA | Gemminger and Harold, 1868 |
| *B. solieri* | -39.15072 | -72.13568 | IADIZA | Gemminger and Harold, 1868 |
| *B. solieri* | -39.17767 | -71.722 | IADIZA:CEI:3912 | Gemminger and Harold, 1868 |
| *B. solieri* | -39.8 | -73.2333 | Solier, 1849 | Gemminger and Harold, 1868 |
| *B. solieri* | -33.3666 | -71.6666 | Jeannel, 1962 | Gemminger and Harold, 1868 |
| *B. solieri* | -33.63333 | -78.86667 | Jeannel, 1962 | Gemminger and Harold, 1868 |
| *B. solieri* | -33.0477 | -71.6011 | MNHN | Gemminger and Harold, 1868 |
| *B. solieri* | -36.8333 | -73.05 | Jeannel, 1962 | Gemminger and Harold, 1868 |
| *B. solieri* | -35.3333 | -72.4166 | Jeannel, 1962 | Gemminger and Harold, 1868 |
| *B. solieri* | -33.3518 | -70.32794 | IADIZA | Gemminger and Harold, 1868 |
| *B. solieri* | -33.35027 | -70.35491 | IADIZA:CEI:5699 | Gemminger and Harold, 1868 |
| *B. solieri* | -33.34058 | -70.29195 | IADIZA | Gemminger and Harold, 1868 |
| *B. solieri* | -33.74269 | -70.45289 | Solervicens Alessandri, 2014 | Gemminger and Harold, 1868 |
| *B. solieri* | -33.28333 | -70.66667 | Solier, 1849 | Gemminger and Harold, 1868 |
| *B. spinolai* | -35.31961 | -70.33383 | IADIZA:CEI:10225 | Solier, 1849 |
| *B. spinolai* | -35.5323 | -70.00731 | IADIZA:CEI:23151 | Solier, 1849 |
| *B. spinolai* | -34.24381 | -68.67303 | IADIZA:CEI:21650 | Solier, 1849 |
| *B. spinolai* | -36.3741 | -69.6794 | IADIZA | Solier, 1849 |
| *B. spinolai* | -36.3338 | -69.6735 | IADIZA:CEI:5143 | Solier, 1849 |
| *B. spinolai* | -32.66667 | -69.51667 | IADIZA:CEI:4422 | Solier, 1849 |
| *B. spinolai* | -33.29481 | -69.01367 | IADIZA:CEI:21648 | Solier, 1849 |
| *B. spinolai* | -41.15 | -71.3 | IADIZA:CEI:4412 | Solier, 1849 |
| *B. spinolai* | -41.96834 | -71.53555 | Nègre, 1973 | Solier, 1849 |
| *B. spinolai* | -41.85069 | -70.9027 | IADIZA:CEI:4418 | Solier, 1849 |
| *B. spinolai* | -43.2939 | -71.42266 | IADIZA:CEI:11309 | Solier, 1849 |
| *B. spinolai* | -40.1015 | -70.7545 | IADIZA | Solier, 1849 |
| *B. spinolai* | -39.57028 | -71.44083 | IADIZA:CEI:4054 | Solier, 1849 |
| *B. spinolai* | -40.13136 | -71.19942 | IADIZA:CEI:4421 | Solier, 1849 |
| *B. spinolai* | -37.37809 | -70.27068 | IADIZA:CEI:5146 | Solier, 1849 |
| *B. spinolai* | -39.20331 | -70.1043 | IADIZA | Solier, 1849 |
| *B. spinolai* | -37.0679 | -69.7566 | IADIZA | Solier, 1849 |
| *B. spinolai* | -40.00113 | -70.83369 | IADIZA:CEI:4382 | Solier, 1849 |
| *B. spinolai* | -40.91667 | -71.08333 | IADIZA:CEI:4387 | Solier, 1849 |
| *B. spinolai* | -17.8149 | -66.40163 | Toledano, 2008 | Solier, 1849 |
| *B. spinolai* | -31.6308 | -71.1652 | Jeannel, 1962 | Solier, 1849 |
| *B. spinolai* | -32.78333 | -71.21667 | Jeannel, 1962 | Solier, 1849 |
| *B. spinolai* | -32.88333 | -71.26667 | Jeannel, 1962 | Solier, 1849 |
| *B. spinolai* | -36.65 | -72.45 | IADIZA | Solier, 1849 |
| *B. spinolai* | -35.06617 | -71.12417 | IADIZA | Solier, 1849 |
| *B. spinolai* | -35.3333 | -72.4166 | Jeannel, 1962 | Solier, 1849 |
| *B. spinolai* | -33.28333 | -70.66667 | Solier, 1849 | Solier, 1849 |
| *B. tucumanus* | -31.429 | -67.06717 | IADIZA:CEI:5319 | Jeannel, 1962 |
| *B. tucumanus* | -34.9048 | -68.88726 | IADIZA:CEI:5297 | Jeannel, 1962 |
| *B. tucumanus* | -27.4666 | -65.6833 | Jeannel, 1962 | Jeannel, 1962 |
| *B. uniformis* | -32.81667 | -69.95 | IADIZA:CEI:4184 | Jeannel, 1962 |
| *B. uniformis* | -41.50667 | -71.53833 | IADIZA:CEI:4196 | Jeannel, 1962 |
| *B. uniformis* | -30.33506 | -69.73093 | IADIZA:CEI:5692 | Jeannel, 1962 |
| *B. uniformis* | -40.15504 | -71.3533 | IADIZA:CEI:4209 | Jeannel, 1962 |
| *B. uniformis* | -39.57028 | -71.44083 | IADIZA:CEI:5673 | Jeannel, 1962 |
| *B. uniformis* | -36.81792 | -71.073 | IADIZA:CEI:5658 | Jeannel, 1962 |
| *B. uniformis* | -40.22733 | -71.28793 | IADIZA:CEI:5671 | Jeannel, 1962 |
| *B. uniformis* | -39.58339 | -71.42889 | IADIZA:CEI:5672 | Jeannel, 1962 |

**References**

Berg, C. (1883). Zur Pampa fauna. Stettiner Entomologische Zeitung 44: 392-396.

Bruch, C. (1911). Catálogo sistemático de los Coleópteros de la República Argentina. Pars I. Familia

Carabidae (Cicindelinae, Carabinae). Revista del Museo de La Plata (Segunda Serie) 4(17): 143-180.

Canepuccia, A. D., Cicchino, A., Escalante, A., Novaro, A., & Isacch, J. P. (2009). Differential responses of marsh arthropods to rainfall-induced habitat loss. *Zoological Studies*, *48*(2), 174-183.

Castro, A. V., Porrini, D. P., & Cicchino, A. C. (2014). Annual activity density of groundbeetles (Coleoptera: Carabidae) of a Celtis ehrenbergiana (Rosales: Celtidaceae) forest of Buenos Aires province, Argentina. *Journal of Insect Science*, *14*(1), 252.

Cicchino, A.C. (2006ª). Diversidad de carábidos (insecta, Coleoptera, Carabidae) de dos asociaciones de tala en la Laguna de Los Padres, Partido de General Pueyrredón, Provincia de Buenos Aires: En: Mérida, E. y J. Athor (editores), Talares Bonaerenses y su Conservación. Biodiversidad y áreas prioritarias para la conservación de los talares bonaerenses, Fundación de Historia Natural "Félix de Azara". Buenos Aires. págs. 128-136.

Cicchino, A.C. (2006b). Diversidad de carábidos (Insecta, Coleoptera, Carabidae) de un talar joven de la Laguna Nahuel Rucá, Partido de Mar Chiquita, provincia de Buenos Aires. En: Mérida, E. y J. Athor (editores), Talares Bonaerenses y su Conservación. Biodiversidad y áreas prioritarias para la conservación de los talares bonaerenses, Fundación de Historia Natural "Félix de Azara". Buenos Aires. Pp.137-145.

Cicchino, A.C. (2007). La carabidofauna edáfica de los ambientes litorales marítimos, dunales y retrodunales del Partido de General Pueyrredón, Provincia de Buenos Aires. Su importancia como herramienta de manejo de estos espacios. En: VI Encuentro Nacional Científico Técnico de Biología del Suelo y IV Encuentro sobre Fijación Biológica del Nitrógeno. Libro de Resúmenes (ISBN 978-950-665-438-2), A4 002: 1-19, 2007.

Cicchino, A.C. (2009). Materiales para el estudio de las especies de Carabidae (Insecta, Coleoptera) del Parque Costero del Sur. En: Athor, J. (editor). Parque Costero del Sur- Naturaleza, conservación y patrimonio cultural. Fundación de Historia Natural «Félix de Azara». 528 pp. Buenos Aires. Pp. 149-169,

Cicchino, A. C., Nanni, A. S., Fracassi, N. G., & Quintana, R. D. (2013). Las Carabidae (Insecta, Coleoptera) de los suelos del Bajo Delta Bonaerense del Río Paraná: Estado actual de su conocimiento.

Cicchino, A. C., Porrini, D. P., & Castro, A. V. (2010). Riqueza específica de las Carabidae (Insecta, Coleoptera) de los suelos de la Reserva Integral Laguna de los Padres, Partido de General Pueyrredón, provincia de Buenos Aires: Resultados de diez años de muestreos (1999-2009).

Cicchino, A. C., & Scampini, E. M. (2000). Contribución al conocimiento de la carabidofauna edáfica de la Isla Martín García, provincia de Buenos Aires (Argentina).

Cicchino, A.C. & C. Storti. (2007). Riqueza específica de los Carábidos (Insecta, Coleoptera) de los suelos del partido de Saladillo, provincia de Buenos Aires, argentina. Resultados preliminares. VI Encuentro Nacional Científico Técnico de Biología del Suelo y IV Encuentro sobre Fundación Biológica del Nitrógeno, Libro de Resúmenes (ISBN 978-950-665- 438-2), A4 005: 1-14

Ferrú, M. A., & Elgueta, M. (2011). Lista de coleópteros (Insecta: Coleoptera) de las regiones de Arica y Parinacota y de Tarapacá, Chile. *Boletín Museo Nacional de Historia Natural*, *60*, 9-61.

Germain, P. (1911) Catálogo de los Coléopteros Chilenos del Museo Nacional. Boletín del Museo Nacional de Chile, 3(1), 47-73.

Jeannel, R. (1962) Les Trechidae de la paleantarctide occidentale. Biologie d'Amerique australe (Delamare Debouteville, C.D. y E. Rapoport eds.). Volumen 1, 527-655. CNRS et CNICT, Paris.Jensen-Haarup, A.C. (1910) New species of Coleoptera from West Argentina. Deustche Entomologische Zeitschrift, 1910: 541-554.

Maddison, D. R. (2014). An unexpected clade of South American ground beetles (Coleoptera, Carabidae, Bembidion). *ZooKeys*, (416), 113.Marasas, M. E., Sarandón, S. J., & Cicchino, A. (2010). Semi-natural habitats and field margins in a typical agroecosystem of the Argentinean Pampas as a reservoir of carabid beetles. *Journal of Sustainable Agriculture*, *34*(2), 153-168.

Nègre, J. 1973. The zoological results of Gy. Tópal's collectings in South Argentine. 24. Coléoptères: Carabidae. Folia Entomologica Hungarica 26: 289-310.Paleologos, M. F. (2012). *Los carábidos como componentes clave de la agrobiodiversidad* (Doctoral dissertation, Universidad Nacional de La Plata).Reed, E.C. (1874) On the Coleoptera Geodephaga of Chile. *Proceedings of the Zoological Society of London*, 1874, 48-70.

Roig-Juñent, S., & Scheibler, E. (2004). A new Argentinian species of Bembidion (Chilioperyphus)(Coleoptera: Carabidae: Bembidiini) with accessory setae. *Zootaxa*, *782*(1), 1-10.

Solervicens Alessandini, J. 2014. Coleópteros de la Reserva Nacional Río Clarillo, en Chile Central: taxonomía, biología y biogeografía. Santiago: Conaf, 478 pp.

Solier, J.J. (1849) Coleópteros Pentámeros: En: *Historia Físico y Política de Chile* (Gay, C. ed.) Volúmen 4 (Zoología), 105-507. Paris:

Fain & Thunot.Toledano, L. (2008) Systematic notes on the Palaearctic *Bembidion* Latreille, 1802 (Coleoptera, Carabidae) with particular reference to the fauna of China. Memorie del Museo Civico di Storia Naturale di Verona – 2. serie Sezione Scienze della Vita, 18, 5–46.

Tremoleras, J. 1931. Notas sobre Carabidos Platenses. Revista de la Sociedad Entomológica Argentina 3(15): 239-242.

**The specimens deposited at the following Institutions was identified by Roig-Juñet:**

American Museum of Natural History, New York, United States: (AMNH).

Facultad Cs. Naturales de Córdoba, Córdoba, Argentina: (FUNCo).

Fundación e Instituto Miguel Lillo, Tucumán, Argentina: (FIML).

Instituto Argentino de Investigaciones de Zonas Áridas, Mendoza, Argentina: (IADIZA).

Instituto de Entomología de la Universidad Metropolitana de Ciencias de la Educación, Santiago, Chile: (MUNCE)

Museo Argentino de Ciencias Naturales Bernardino Rivadavia, Buenos Aires, Argentina: (MACN).

Museo Nacional de Historia Natural, Santiago, Chile: (MNHN).

Museo de Historia Natural de Concepción, Concepción, Chile: (MZUC).

Museo de La Plata, Buenos Aires, Argentina: (MLP).

**SI3.** Weighting schemes tested for zonation analyses. SR, Species richness; WE, Weighted endemicity; LTR, Long term refugia; STR P_P, Short term refugia Past-Present; STR P_F, Short term refugia Present-Future.

|  | **SR** | **WE** | **LTR** | **STR P_P** | **STR P_F** |
| --- | --- | --- | --- | --- | --- |
| **Analysis I** | 0.20 | 0.20 | 0.20 | 0.20 | 0.20 |
| **Analysis II** | 0.3 | 0.3 | 0.13 | 0.13 | 0.13 |
| **Analysis III** | 0.13 | 0.13 | 0.24 | 0.24 | 0.25 |
| **Analysis IV** | 0.13 | 0.13 | 0.30 | 0.20 | 0.25 |

**SI4.** ENM settings and performance; non-validated models in yellow.

| **Species** | **Features** | **Beta** | **Mean Auc-Ratio** | **P** | **ΔAICc-null** | **Validated** |
| --- | --- | --- | --- | --- | --- | --- |
| *B. antarcticum* | LHQ | 3 | 1.209 | <0.05 | 1.69 | no |
| *B. aricencis* | L | 0.5 | 1.586 | <0.05 | 29.39 | yes |
| *B. aubei* | LQ | 0.5 | 1.406 | <0.05 | 30.21 | yes |
| *B. chaudoirianus* | LQ | 1.5 | 1.12 | <0.05 | 3.50 | no |
| *B. chilensis* | LQ | 1 | 1.2682 | <0.05 | 67.02 | yes |
| *B. convergens* | LQ | 0.5 | 1.21 | <0.05 | 24.05 | yes |
| *B. cupreostriatus* | QH | 3 | 1.14 | <0.05 | 11.82 | yes |
| *B. derbesi* | Q | 0.5 | 1.4477 | <0.05 | 17.72 | yes |
| *B. engelhardti* | Q | 0.5 | 1.12 | <0.05 | 2.54 | no |
| *B. fisheri* | L | 3.5 | 1.31 | <0.05 | 1.35 | no |
| *B. hirtipes* | LQ | 0.5 | 1.55 | <0.05 | 56.16 | yes |
| *B. jacobseni* | LQ | 2 | 1.14 | <0.05 | 18.87 | yes |
| *B. lonae* | L | 0.5 | 1.16 | <0.05 | 11.29 | yes |
| *B. laticolle* | LQ | 0.5 | 1.09 | <0.05 | 46.65 | yes |
| *B. mendocinus* | Q | 0.5 | 1.47 | <0.05 | 38.28 | yes |
| *B. mirasoi* | Q | 2 | 1.1867 | <0.05 | 0.68 | no |
| *B. neodelamarei* | Q | 1 | 1.21 | <0.05 | 1.25 | no |
| *B. nigrita* | LQ | 1.5 | 1.41 | <0.05 | 5.79 | yes |
| *B. olivieri* | Q | 1 | 1.33 | <0.05 | 4.00 | no |
| *B. orregoi* | LHQ | 3.5 | 1.23 | <0.05 | 2.77 | no |
| *B. pallideguttula* | L | 2.5 | 01.09 | <0.05 | -1.78 | no |
| *B. philippii* | L | 0.5 | 1.36 | <0.05 | 2.3 | no |
| *B. posticalis* | LQ | 0.5 | 1.31 | <0.05 | 34.42 | yes |
| *B. punctigerum* | L | 0.5 | 1.25 | <0.05 | 9.3 | yes |
| *B. resignatum* | L | 1.5 | 1.15 | <0.05 | 2.95 | no |
| *B. ringueleti* | L | 0.5 | 1.12 | <0.05 | 2.84 | no |
| *B. rufoplagiatus* | LQ | 3 | 1.256 | <0.05 | 14.52 | yes |
| *B. scitulum* | Q | 0.5 | 1.39 | <0.05 | 18.25 | yes |
| *B. sexfoveolatum* | H | 2.5 | 1.28 | <0.05 | 1.04 | no |
| *B. solieri* | LQ | 0.5 | 1.13 | <0.05 | 25.03 | yes |
| *B. spinolai* | LQ | 0.5 | 1.49 | <0.05 | 28.34 | yes |

**SI5.** IRA maps. Biogeographical divisions: dark green, Patagonian-Andean region; grey, South American Transition Zone; Light green, Neotropical region. Ecoregions: CADP, Central Andean Dry Puna; CM, Chilean Matorral; DC, Dry Chaco; E, Espinal; HM, High Monte; HP, Humid Pampas; LM, Low Monte; MSF, Magellanic Subpolar Forest; PS, Patagonian Steppe; SAS, Southern Andean Steppe; SAY, Southern Andean Yungas; VTF, Valdivian Temperate Forest. IRAs in blue


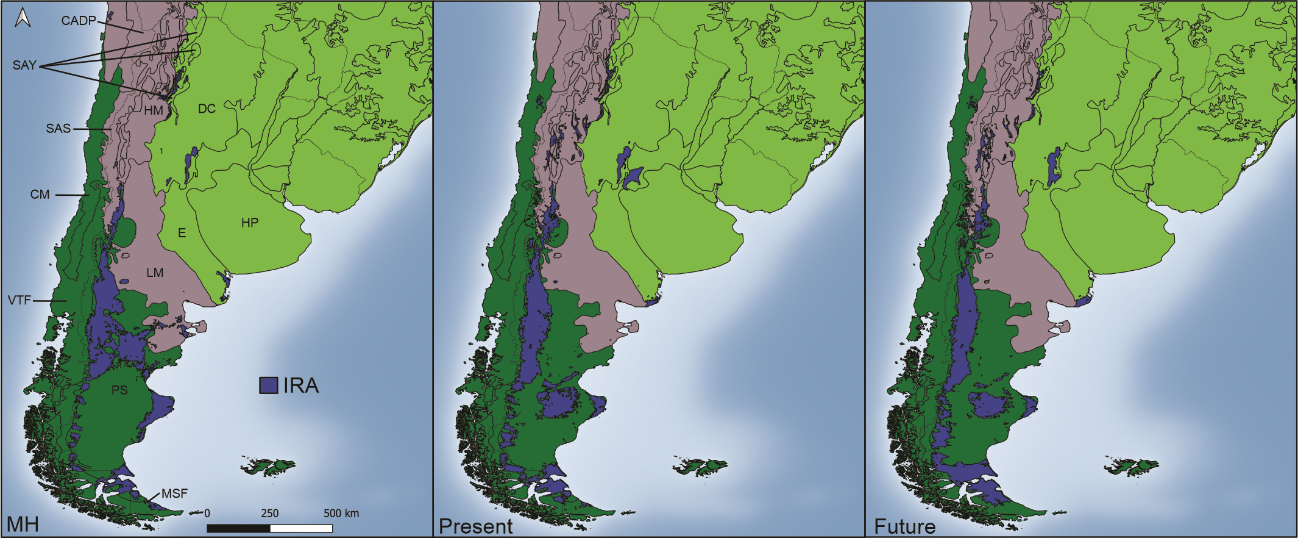


**SI6.** Graph showing the number of cells with each SR score


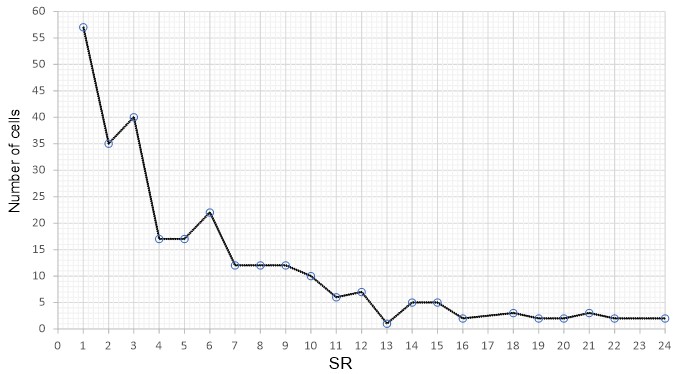


**SI7.** Priority areas recovered in the zonation analyses conducted with four sets of weights. From right to left analysis I, II, III and IV


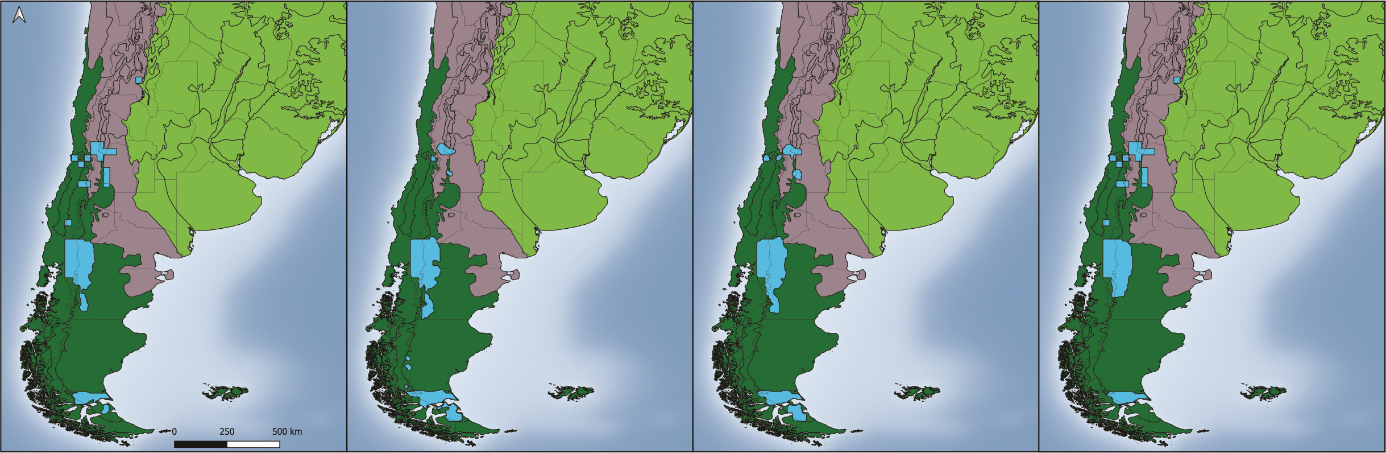

Supplement: Supplementary file 1 [file e56428d39322ef5a2bbe1b57.docx]
